# Supplementary material for: Bridging the Medication Adherence Gap from Therapeutic Drug Monitoring: A Bayesian approach for Anti-Seizure Medications
Source: Research Square preprint supplement (doi:10.21203/rs.3.rs-5884827/v1), 2025-01-30

Reporting Summary

Nature Portfolio wishes to improve the reproducibility of the work that we publish. This form provides structure for consistency and transparency in reporting. For further information on Nature Portfolio policies, see our [Editorial Policies](#) and the [Editorial Policy Checklist](#).  
Please do not complete any field with "not applicable" or n/a. Refer to the help text for what text to use if an item is not relevant to your study.  
For final submission: please carefully check your responses for accuracy; you will not be able to make changes later.

Statistics

For all statistical analyses, confirm that the following items are present in the figure legend, table legend, main text, or Methods section.

|                                     |                                                                                                                                                                                                                                                                                     |
|-------------------------------------|-------------------------------------------------------------------------------------------------------------------------------------------------------------------------------------------------------------------------------------------------------------------------------------|
| n/a                                 | Confirmed                                                                                                                                                                                                                                                                           |
| <input type="checkbox"/>            | <input checked="" type="checkbox"/> The exact sample size ( <i>n</i> ) for each experimental group/condition, given as a discrete number and unit of measurement                                                                                                                    |
| <input checked="" type="checkbox"/> | <input type="checkbox"/> A statement on whether measurements were taken from distinct samples or whether the same sample was measured repeatedly                                                                                                                                    |
| <input checked="" type="checkbox"/> | <input type="checkbox"/> The statistical test(s) used AND whether they are one- or two-sided<br><i>Only common tests should be described solely by name; describe more complex techniques in the Methods section.</i>                                                               |
| <input type="checkbox"/>            | <input checked="" type="checkbox"/> A description of all covariates tested                                                                                                                                                                                                          |
| <input type="checkbox"/>            | <input checked="" type="checkbox"/> A description of any assumptions or corrections, such as tests of normality and adjustment for multiple comparisons                                                                                                                             |
| <input checked="" type="checkbox"/> | <input type="checkbox"/> A full description of the statistical parameters including central tendency (e.g. means) or other basic estimates (e.g. regression coefficient) AND variation (e.g. standard deviation) or associated estimates of uncertainty (e.g. confidence intervals) |
| <input checked="" type="checkbox"/> | <input type="checkbox"/> For null hypothesis testing, the test statistic (e.g. <i>F</i> , <i>t</i> , <i>r</i> ) with confidence intervals, effect sizes, degrees of freedom and <i>P</i> value noted<br><i>Give P values as exact values whenever suitable.</i>                     |
| <input type="checkbox"/>            | <input checked="" type="checkbox"/> For Bayesian analysis, information on the choice of priors and Markov chain Monte Carlo settings                                                                                                                                                |
| <input checked="" type="checkbox"/> | <input type="checkbox"/> For hierarchical and complex designs, identification of the appropriate level for tests and full reporting of outcomes                                                                                                                                     |
| <input checked="" type="checkbox"/> | <input type="checkbox"/> Estimates of effect sizes (e.g. Cohen's <i>d</i> , Pearson's <i>r</i> ), indicating how they were calculated                                                                                                                                               |

Our web collection on [statistics for biologists](#) contains articles on many of the points above.

Software and code

Policy information about [availability of computer code](#)

|                 |                                                                                                                        |
|-----------------|------------------------------------------------------------------------------------------------------------------------|
| Data collection | The data was collected from previous reported studies, and described clearly in the main text and supplementary files. |
| Data analysis   | The extracted data was analyzed in R software with the packages used described in the main text.                       |

For manuscripts utilizing custom algorithms or software that are central to the research but not yet described in published literature, software must be made available to editors and reviewers. We strongly encourage code deposition in a community repository (e.g. GitHub). See the Nature Portfolio [guidelines for submitting code & software](#) for further information.

Data

Policy information about [availability of data](#)

All manuscripts must include a [data availability statement](#). This statement should provide the following information, where applicable:

- Accession codes, unique identifiers, or web links for publicly available datasets
- A description of any restrictions on data availability
- For clinical datasets or third party data, please ensure that the statement adheres to our [policy](#)

All data generated or analyzed during this study are included in this article and its supplementary information files.

## Research involving human participants, their data, or biological material

Policy information about studies with [human participants or human data](#). See also policy information about [sex, gender \(identity/presentation\), and sexual orientation](#) and [race, ethnicity and racism](#).

|                                                                    |                                                                                                                                                        |
|--------------------------------------------------------------------|--------------------------------------------------------------------------------------------------------------------------------------------------------|
| Reporting on sex and gender                                        | The information about sex and gender of each study could obtained from the original studies.                                                           |
| Reporting on race, ethnicity, or other socially relevant groupings | The information about race, ethnicity and other socially relevant groupings could obtained from the original studies, which are referred in our study. |
| Population characteristics                                         | The population characteristics were described in supplementary files.                                                                                  |
| Recruitment                                                        | The information about recruitment could obtained from the original studies.                                                                            |
| Ethics oversight                                                   | The information about ethics oversight could obtained from the original studies.                                                                       |

Note that full information on the approval of the study protocol must also be provided in the manuscript.

## Field-specific reporting

Please select the one below that is the best fit for your research. If you are not sure, read the appropriate sections before making your selection.

☐ Life sciences ☒ Behavioural & social sciences ☐ Ecological, evolutionary & environmental sciences

For a reference copy of the document with all sections, see [nature.com/documents/nr-reporting-summary-flat.pdf](https://www.nature.com/documents/nr-reporting-summary-flat.pdf)

## Life sciences study design

All studies must disclose on these points even when the disclosure is negative.

|                 |                 |
|-----------------|-----------------|
| Sample size     | Not applicable. |
| Data exclusions | Not applicable. |
| Replication     | Not applicable. |
| Randomization   | Not applicable. |
| Blinding        | Not applicable. |

## Behavioural & social sciences study design

All studies must disclose on these points even when the disclosure is negative.

|                   |                                                                                                                    |
|-------------------|--------------------------------------------------------------------------------------------------------------------|
| Study description | The simulation study aiming to evaluate the capability of a Bayesian approach in assessing adherence.              |
| Research sample   | The research samples were extracted based on previously reported studies and related demographic characteristics.  |
| Sampling strategy | The samples were extracted from clinical studies with large sample size which met predetermined criteria.          |
| Data collection   | The data were collected from selected resources, and explicitly reported in the main text and supplementary files. |
| Timing            | The timing for sampling and data collection were described in the method of the manuscript.                        |
| Data exclusions   | Data from clinical studies which did not met the criteria were excluded, and reported in supplementary files.      |
| Non-participation | Not applicable.                                                                                                    |
| Randomization     | The randomization in our study was realized through Monte Carlo simulation in R software.                          |

# Ecological, evolutionary & environmental sciences study design

All studies must disclose on these points even when the disclosure is negative.

|                          |                 |
|--------------------------|-----------------|
| Study description        | Not applicable. |
| Research sample          | Not applicable. |
| Sampling strategy        | Not applicable. |
| Data collection          | Not applicable. |
| Timing and spatial scale | Not applicable. |
| Data exclusions          | Not applicable. |
| Reproducibility          | Not applicable. |
| Randomization            | Not applicable. |
| Blinding                 | Not applicable. |

Did the study involve field work? ☐ Yes ☒ No

## Field work, collection and transport

|                        |                 |
|------------------------|-----------------|
| Field conditions       | Not applicable. |
| Location               | Not applicable. |
| Access & import/export | Not applicable. |
| Disturbance            | Not applicable. |

## Reporting for specific materials, systems and methods

We require information from authors about some types of materials, experimental systems and methods used in many studies. Here, indicate whether each material, system or method listed is relevant to your study. If you are not sure if a list item applies to your research, read the appropriate section before selecting a response.

### Materials & experimental systems

| n/a                                 | Involved in the study                                  |
|-------------------------------------|--------------------------------------------------------|
| <input checked="" type="checkbox"/> | <input type="checkbox"/> Antibodies                    |
| <input checked="" type="checkbox"/> | <input type="checkbox"/> Eukaryotic cell lines         |
| <input checked="" type="checkbox"/> | <input type="checkbox"/> Palaeontology and archaeology |
| <input checked="" type="checkbox"/> | <input type="checkbox"/> Animals and other organisms   |
| <input checked="" type="checkbox"/> | <input type="checkbox"/> Clinical data                 |
| <input checked="" type="checkbox"/> | <input type="checkbox"/> Dual use research of concern  |
| <input checked="" type="checkbox"/> | <input type="checkbox"/> Plants                        |

### Methods

| n/a                                 | Involved in the study                           |
|-------------------------------------|-------------------------------------------------|
| <input checked="" type="checkbox"/> | <input type="checkbox"/> ChIP-seq               |
| <input checked="" type="checkbox"/> | <input type="checkbox"/> Flow cytometry         |
| <input checked="" type="checkbox"/> | <input type="checkbox"/> MRI-based neuroimaging |

## Antibodies

|                 |                 |
|-----------------|-----------------|
| Antibodies used | Not applicable. |
| Validation      | Not applicable. |

## Eukaryotic cell lines

Policy information about [cell lines and Sex and Gender in Research](#)

|                                                                      |                 |
|----------------------------------------------------------------------|-----------------|
| Cell line source(s)                                                  | Not applicable. |
| Authentication                                                       | Not applicable. |
| Mycoplasma contamination                                             | Not applicable. |
| Commonly misidentified lines<br>(See <a href="#">ICLAC</a> register) | Not applicable. |

## Palaeontology and Archaeology

|                                                                                                                                                 |                 |
|-------------------------------------------------------------------------------------------------------------------------------------------------|-----------------|
| Specimen provenance                                                                                                                             | Not applicable. |
| Specimen deposition                                                                                                                             | Not applicable. |
| Dating methods                                                                                                                                  | Not applicable. |
| <input type="checkbox"/> Tick this box to confirm that the raw and calibrated dates are available in the paper or in Supplementary Information. |                 |
| Ethics oversight                                                                                                                                | Not applicable. |

Note that full information on the approval of the study protocol must also be provided in the manuscript.

## Animals and other research organisms

Policy information about [studies involving animals](#); [ARRIVE guidelines](#) recommended for reporting animal research, and [Sex and Gender in Research](#)

|                         |                 |
|-------------------------|-----------------|
| Laboratory animals      | Not applicable. |
| Wild animals            | Not applicable. |
| Reporting on sex        | Not applicable. |
| Field-collected samples | Not applicable. |
| Ethics oversight        | Not applicable. |

Note that full information on the approval of the study protocol must also be provided in the manuscript.

## Clinical data

Policy information about [clinical studies](#)

All manuscripts should comply with the ICMJE [guidelines for publication of clinical research](#) and a completed [CONSORT checklist](#) must be included with all submissions.

|                             |                 |
|-----------------------------|-----------------|
| Clinical trial registration | Not applicable. |
| Study protocol              | Not applicable. |
| Data collection             | Not applicable. |
| Outcomes                    | Not applicable. |

## Dual use research of concern

Policy information about [dual use research of concern](#)

### Hazards

Could the accidental, deliberate or reckless misuse of agents or technologies generated in the work, or the application of information presented in the manuscript, pose a threat to:

| No                                  | Yes                                                 |
|-------------------------------------|-----------------------------------------------------|
| <input checked="" type="checkbox"/> | <input type="checkbox"/> Public health              |
| <input checked="" type="checkbox"/> | <input type="checkbox"/> National security          |
| <input checked="" type="checkbox"/> | <input type="checkbox"/> Crops and/or livestock     |
| <input checked="" type="checkbox"/> | <input type="checkbox"/> Ecosystems                 |
| <input checked="" type="checkbox"/> | <input type="checkbox"/> Any other significant area |

## Experiments of concern

Does the work involve any of these experiments of concern:

| No                                  | Yes                                                                                                  |
|-------------------------------------|------------------------------------------------------------------------------------------------------|
| <input checked="" type="checkbox"/> | <input type="checkbox"/> Demonstrate how to render a vaccine ineffective                             |
| <input checked="" type="checkbox"/> | <input type="checkbox"/> Confer resistance to therapeutically useful antibiotics or antiviral agents |
| <input checked="" type="checkbox"/> | <input type="checkbox"/> Enhance the virulence of a pathogen or render a nonpathogen virulent        |
| <input checked="" type="checkbox"/> | <input type="checkbox"/> Increase transmissibility of a pathogen                                     |
| <input checked="" type="checkbox"/> | <input type="checkbox"/> Alter the host range of a pathogen                                          |
| <input checked="" type="checkbox"/> | <input type="checkbox"/> Enable evasion of diagnostic/detection modalities                           |
| <input checked="" type="checkbox"/> | <input type="checkbox"/> Enable the weaponization of a biological agent or toxin                     |
| <input checked="" type="checkbox"/> | <input type="checkbox"/> Any other potentially harmful combination of experiments and agents         |

## Plants

|                       |                 |
|-----------------------|-----------------|
| Seed stocks           | Not applicable. |
| Novel plant genotypes | Not applicable. |
| Authentication        | Not applicable. |

## ChIP-seq

### Data deposition

- ☐ Confirm that both raw and final processed data have been deposited in a public database such as [GEO](#).
- ☐ Confirm that you have deposited or provided access to graph files (e.g. BED files) for the called peaks.

|                                                                    |                 |
|--------------------------------------------------------------------|-----------------|
| Data access links<br><i>May remain private before publication.</i> | Not applicable. |
| Files in database submission                                       | Not applicable. |
| Genome browser session<br>(e.g. <a href="#">UCSC</a> )             | Not applicable. |

### Methodology

|                         |                 |
|-------------------------|-----------------|
| Replicates              | Not applicable. |
| Sequencing depth        | Not applicable. |
| Antibodies              | Not applicable. |
| Peak calling parameters | Not applicable. |
| Data quality            | Not applicable. |
| Software                | Not applicable. |

## Flow Cytometry

### Plots

Confirm that:

- ☐ The axis labels state the marker and fluorochrome used (e.g. CD4-FITC).
- ☐ The axis scales are clearly visible. Include numbers along axes only for bottom left plot of group (a 'group' is an analysis of identical markers).
- ☐ All plots are contour plots with outliers or pseudocolor plots.
- ☐ A numerical value for number of cells or percentage (with statistics) is provided.

### Methodology

- Sample preparation Not applicable.
- Instrument Not applicable.
- Software Not applicable.
- Cell population abundance Not applicable.
- Gating strategy Not applicable.
- ☐ Tick this box to confirm that a figure exemplifying the gating strategy is provided in the Supplementary Information.

## Magnetic resonance imaging

### Experimental design

- Design type Not applicable.
- Design type Not applicable.
- Design specifications Not applicable.
- Behavioral performance measures Not applicable.

- Imaging type(s) Not applicable.
- Field strength Not applicable.
- Sequence & imaging parameters Not applicable.
- Area of acquisition Not applicable.
- Diffusion MRI ☐ Used ☒ Not used

### Preprocessing

- Preprocessing software Not applicable.
- Normalization Not applicable.
- Normalization template Not applicable.
- Noise and artifact removal Not applicable.
- Volume censoring Not applicable.

### Statistical modeling & inference

- Model type and settings Not applicable.
- Effect(s) tested Not applicable.
- Specify type of analysis: ☐ Whole brain ☐ ROI-based ☐ Both

Statistic type for inference

Not applicable.

(See [Eklund et al. 2016](#))

Correction

Not applicable.

## Models &amp; analysis

- |                                     |                                                                       |
|-------------------------------------|-----------------------------------------------------------------------|
| n/a                                 | Involvement in the study                                              |
| <input checked="" type="checkbox"/> | <input type="checkbox"/> Functional and/or effective connectivity     |
| <input checked="" type="checkbox"/> | <input type="checkbox"/> Graph analysis                               |
| <input checked="" type="checkbox"/> | <input type="checkbox"/> Multivariate modeling or predictive analysis |

Functional and/or effective connectivity

Not applicable.

Graph analysis

Not applicable.

Multivariate modeling and predictive analysis

Not applicable.

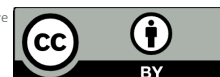

Supplement: Supplementary file 2 [file ce312a49f681d2d48239a290.pdf]
