# Supplementary material for: Bridging the Medication Adherence Gap from Therapeutic Drug Monitoring: A Bayesian approach for Anti-Seizure Medications
Source: Research Square preprint supplement (doi:10.21203/rs.3.rs-5884827/v1), 2025-01-30
Supplement: Supplementary file 1 [file 12da6e7f69df962708bf0fb7.pdf]

## **Bridging the Medication Adherence Gap from Therapeutic Drug Monitoring: A Bayesian approach for Anti-Seizure Medications**

Xiao-Qin Liu<sup>1</sup>, Zi-Ran Li<sup>2</sup>, Wei-Wei Lin<sup>3</sup>, Juan Wang<sup>1</sup>, Fu-Qing Gu<sup>1</sup>, Jun-Jie Ding<sup>4</sup>, Zheng Jiao<sup>1\*</sup>

1. Shanghai Chest Hospital, Shanghai Jiao Tong University School of Medicine, Shanghai, China

2. Department of Bioengineering & Therapeutic Sciences, University of California San Francisco, San Francisco, United States

3. Department of Pharmacy, the First Affiliated Hospital of Fujian Medical University, Fuzhou, China

4. Center for Tropical Disease and Global Health, Nuffield Department of Clinical Medicine, Center for University of Oxford, Oxford UK

### **Supplementary files**

|                                                                                                                                  |    |
|----------------------------------------------------------------------------------------------------------------------------------|----|
| Appendix 1. The updated identification of population pharmacokinetic studies.....                                                | 2  |
| Appendix 2. The new identification of population pharmacokinetic studies.....                                                    | 8  |
| Appendix 3. The identified population pharmacokinetic studies of antiseizure medications and corresponding dosing regimens. .... | 13 |
| Appendix 4. Population pharmacokinetic parameter estimates of the identified ASMs studies. ....                                  | 14 |
| Appendix 5. The posterior probabilities-concentration curves of brivaracetam. ....                                               | 20 |
| Appendix 6. The posterior probabilities-concentration curves of carbamazepine.....                                               | 21 |
| Appendix 7. The posterior probabilities-concentration curves of clobazam.....                                                    | 22 |
| Appendix 8. The posterior probabilities-concentration curves of eslicarbazepine acetate. ....                                    | 23 |
| Appendix 9. The posterior probabilities-concentration curves of lacosamide.....                                                  | 24 |
| Appendix 10. The posterior probabilities-concentration curves of lamotrigine.....                                                | 25 |
| Appendix 11. The posterior probabilities-concentration curves of levetiracetam. ....                                             | 26 |
| Appendix 12. The posterior probabilities-concentration curves of oxcarbazepine. ....                                             | 27 |
| Appendix 13. The posterior probabilities-concentration curves of perampanel. ....                                                | 28 |
| Appendix 14. The posterior probabilities-concentration curves of phenobarbital.....                                              | 29 |
| Appendix 15. The posterior probabilities-concentration curves of topiramate. ....                                                | 30 |
| Appendix 16. The posterior probabilities-concentration curves of valproic acid. ....                                             | 31 |
| Appendix 17. The posterior probabilities-concentration curves of vigabatrin. ....                                                | 32 |
| Appendix 18. The posterior probabilities-concentration curves of zonisamide.....                                                 | 33 |
| Appendix 19. Effect of renal function on the distinguishability of different dosing scenarios .....                              | 34 |
| Appendix 20. Effect of concomitant medicine on the distinguishability of different dosing scenarios .....                        | 35 |
| Appendix 21. Effect of sampling time on the distinguishability of dosing behaviors. ....                                         | 36 |
| Appendix 22. Effect of dosing interval on the distinguishability of dosing behaviors.....                                        | 37 |
| Appendix 23. Effect of prior probability on the distinguishability of dosing behaviors.....                                      | 38 |
| Reference .....                                                                                                                  | 39 |

### **Appendix 1. The updated identification of population pharmacokinetic studies.**

The population pharmacokinetic (PPK) models of commonly used antiseizure medications (ASMs) have been retrieved in our previous study<sup>1</sup>, including carbamazepine, lamotrigine, eslicarbazepine acetate, levetiracetam, oxcarbazepine, phenobarbital, topiramate, valproic acid, clobazam, and zonisamide.

Therefore, updated literature research was performed for these ASMs from 31 March, 2022 to 30 November, 2024. The PPK population PK studies were identified using the following search terms: “drug name” and ‘population pharmacokinetic’, ‘pharmacokinetic modeling’, ‘nonlinear mixed effect model’, ‘NONMEM’, ‘WINNONMIX’, ‘P-PHARM’, ‘nlmixed’, ‘NLME’, ‘USC\*PACK’ or ‘MONOLIX’. Furthermore, the reference lists of the chosen articles were reviewed to uncover any pertinent studies. The literature search was conducted independently by two authors. In cases of disagreement, a third senior investigator was consulted for resolution. The updated literature was selected if they enrolled more participants compared with the previously identified PPK studies, or based on the judgement from the researchers.

After screening, there is no newly published PPK models of carbamazepine, clobazam, eslicarbazepine acetate, phenobarbital and zonisamide from 31 March, 2022 to 30 November, 2024. The updated PRISMA flow diagram for the identification of PPK studies of lamotrigine, levetiracetam, oxcarbazepine, topiramate and valproic acid were shown below.

PRISMA flow diagram for identifying population pharmacokinetic studies of lamotrigine

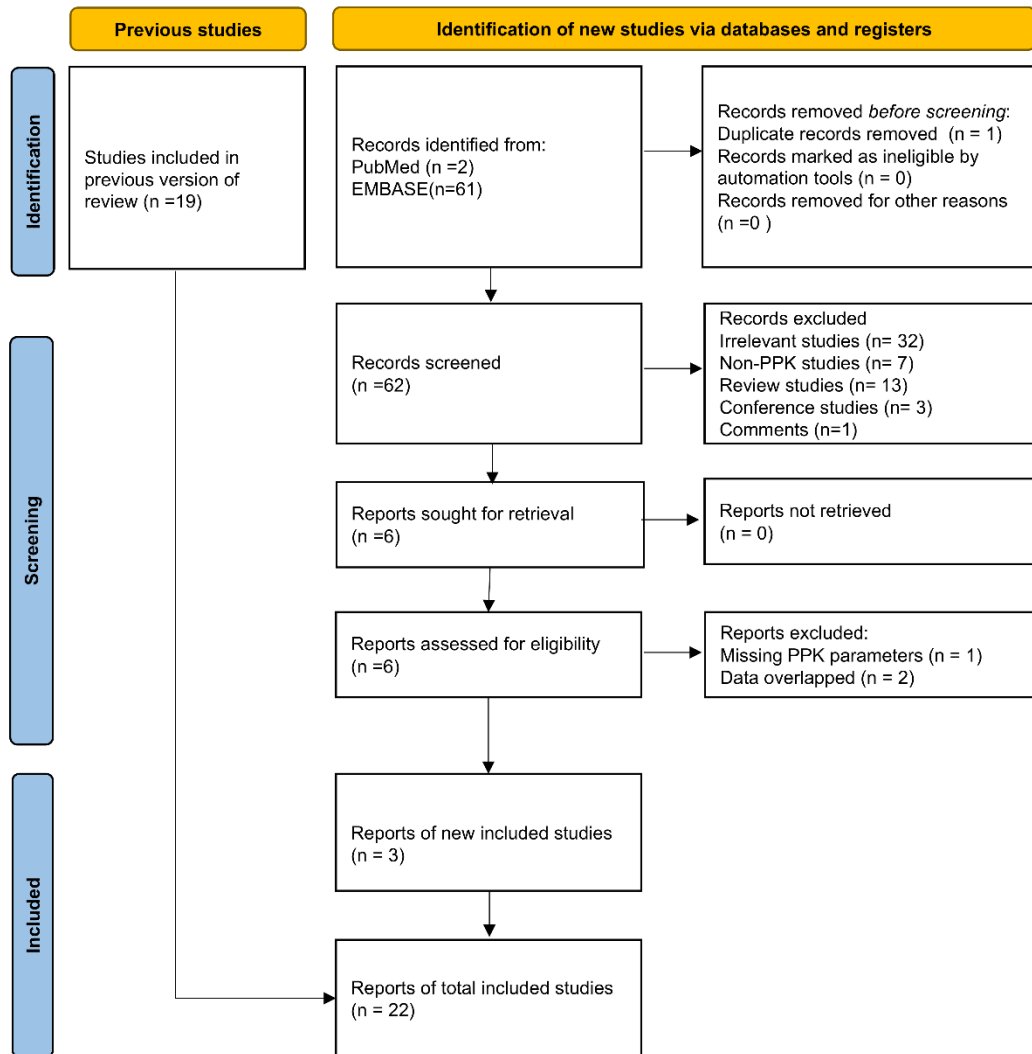

PRISMA flow diagram for identifying population pharmacokinetic studies of levetiracetam

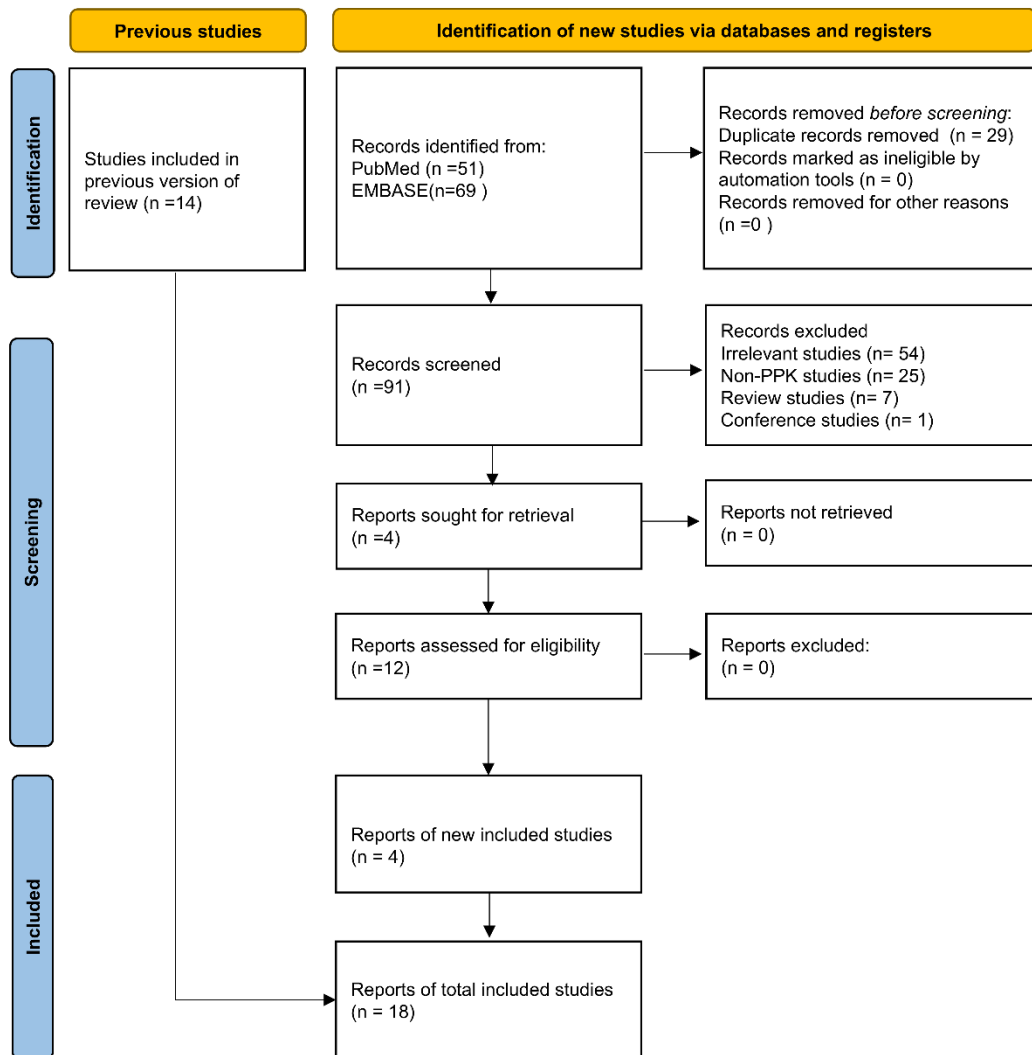

PRISMA flow diagram for identifying population pharmacokinetic studies of oxcarbazepine

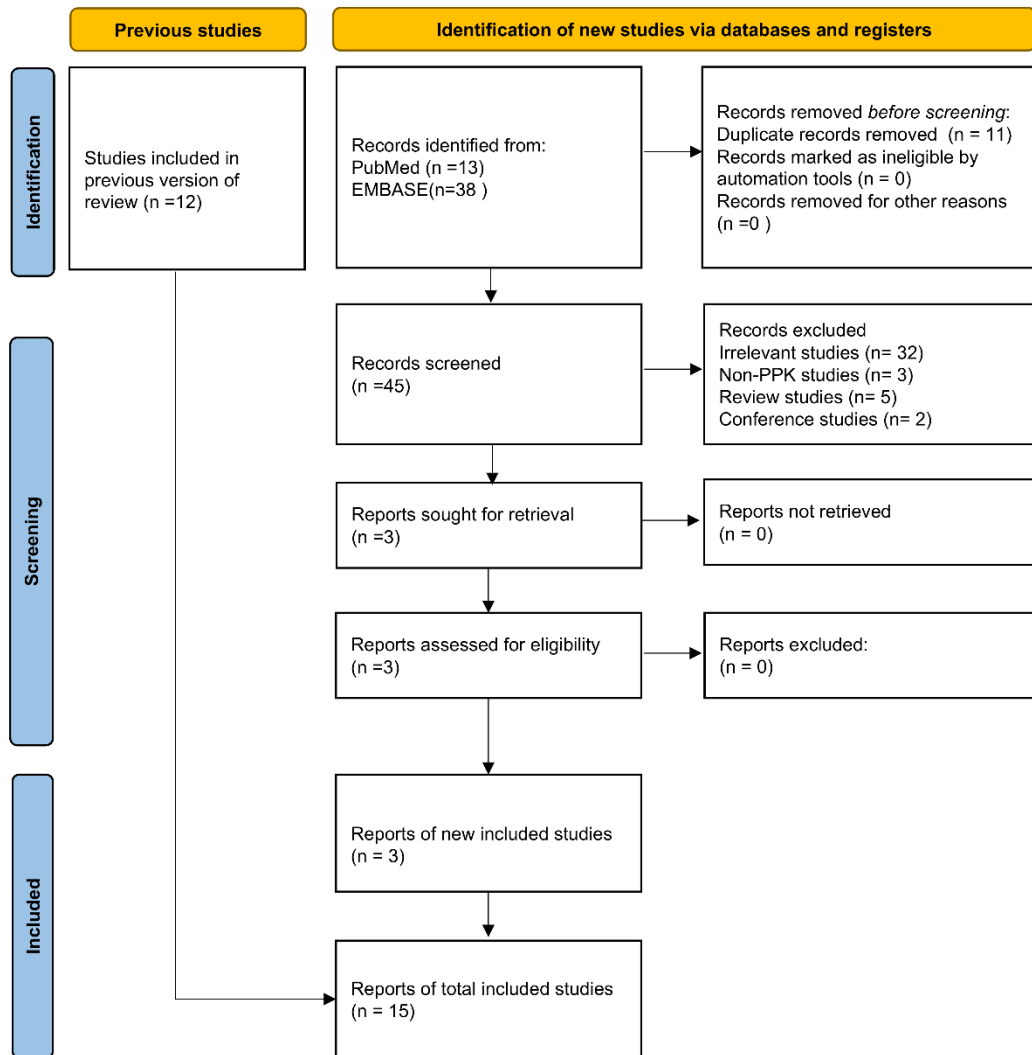

PRISMA flow diagram for identifying population pharmacokinetic studies of topiramate

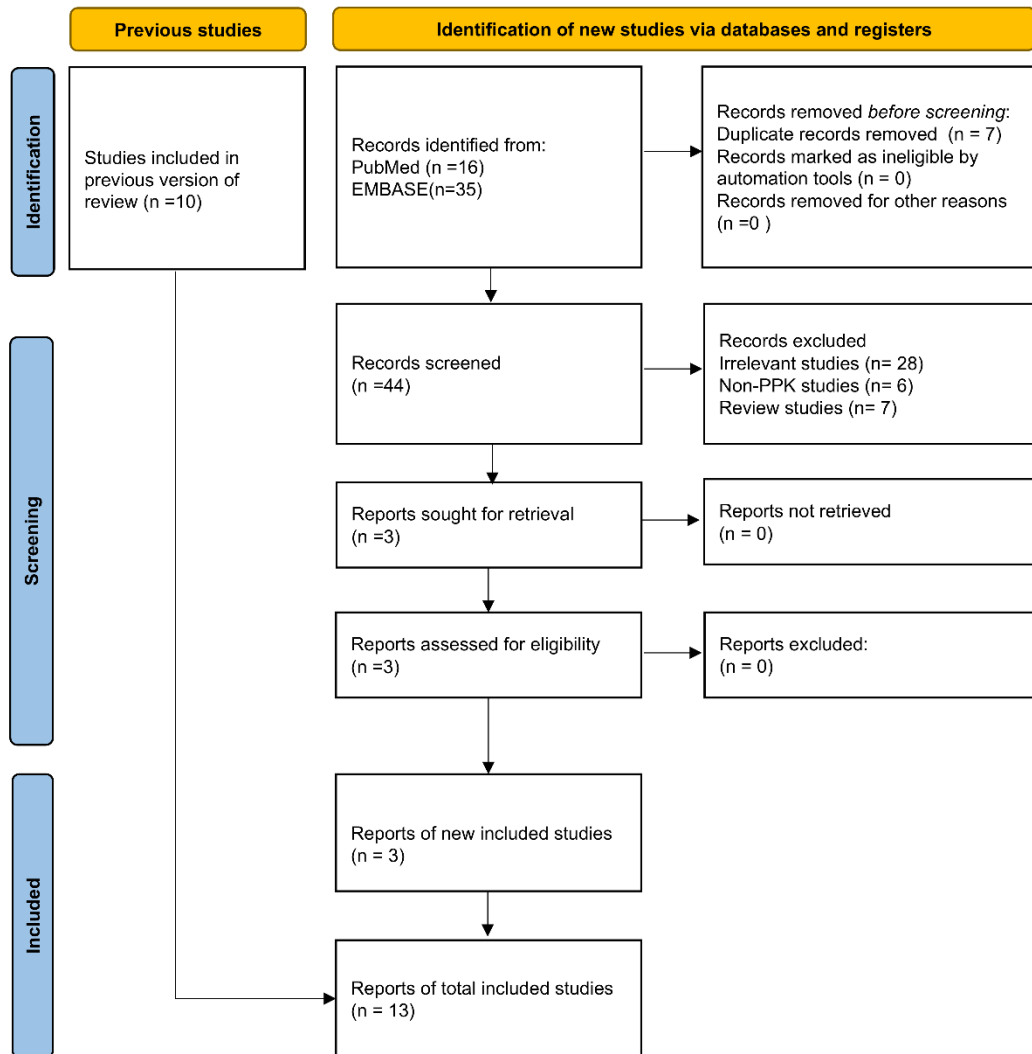

# PRISMA flow diagram for identifying population pharmacokinetic studies of valproic acid

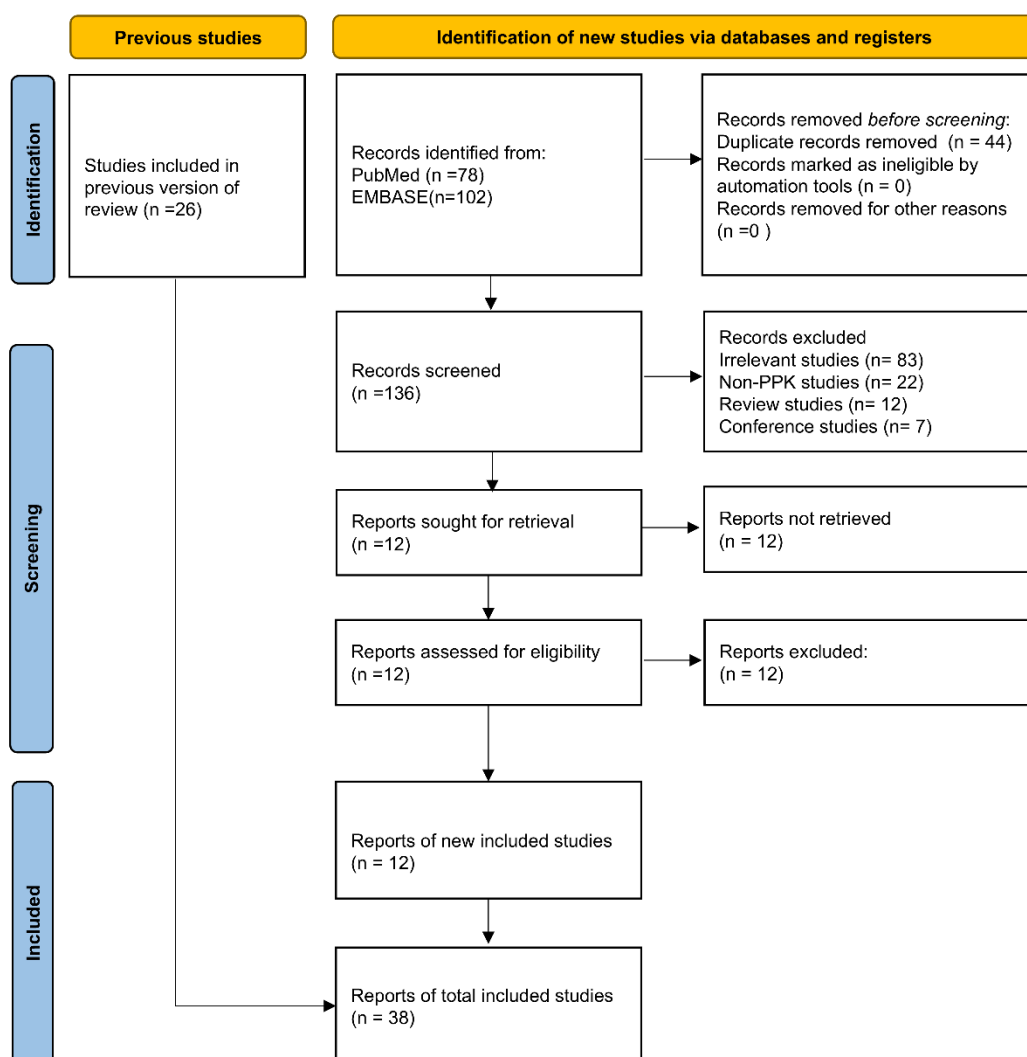

## **Appendix 2. The new identification of population pharmacokinetic studies.**

The PPK models of other 4 ASMs were not identified in previous study, including brivaracetam, lacosamide, perampanel and vigabatrin. Therefore, the PPK studies of these ASMs were screened in the PubMed and Embase from inception until 30 November, 2024.

A study was considered eligible for inclusion if it met the following criteria: (1) the study population included patients with epilepsy; (2) the study was focused on population PKs or pharmacokinetic/pharmacodynamic (PK/PD) analysis; (3) the study enrolled more than 30 participants; (4) the concentration-time profiles of typical patients based on the established model showed no obvious deviation from the others.

A study was excluded if: (1) it was a review or only focused on the methodology, algorithm, or software considerations; (2) it was published in a non-English language; (3) the information on methodology or pharmacokinetics was insufficient; (4) only injection formulation was used; and (5) only neonates were enrolled.

When several studies were identified for one ASM, preference was given to studies that prospectively investigated in multi-centers or studies that included intensive samplings. This process was also performed by two independent reviewers. Moreover, a third senior investigator was consulted to resolve the discrepancies.

The PRISMA flow diagram for the identification of PPK studies of brivaracetam, lacosamide, perampanel and vigabatrin were shown below.



PRISMA flow diagram for identifying population pharmacokinetic studies of brivaracetam

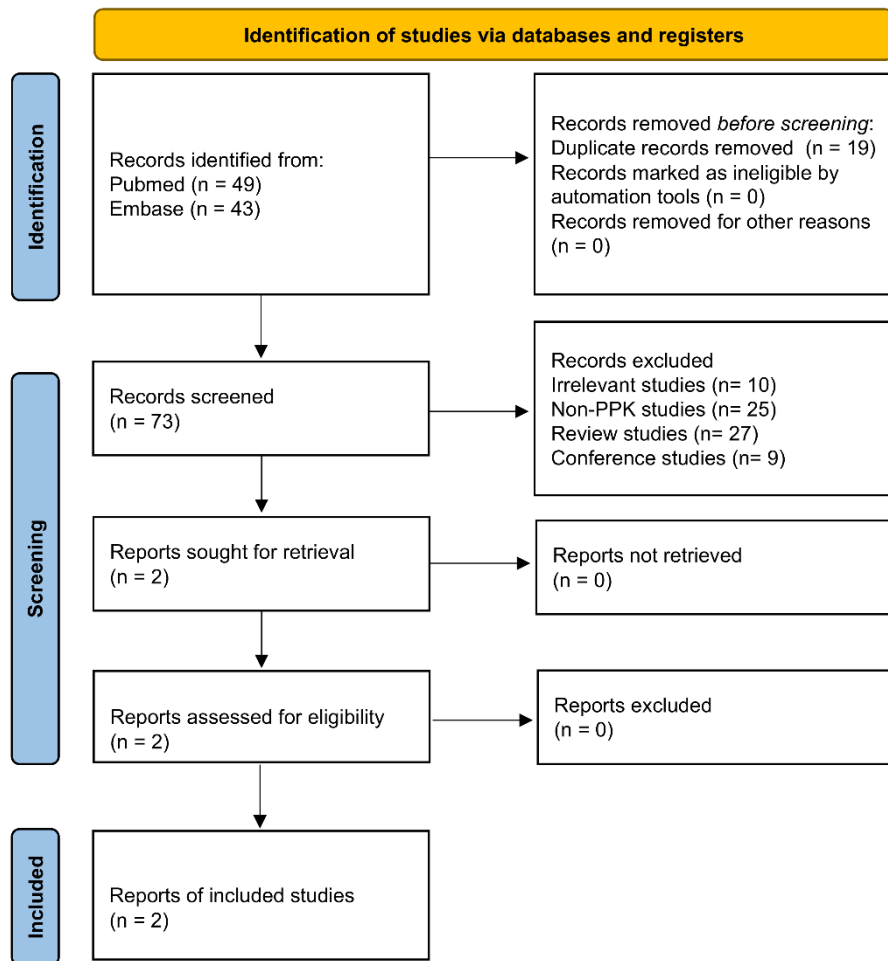

# PRISMA flow diagram for identifying population pharmacokinetic studies of lacosamide

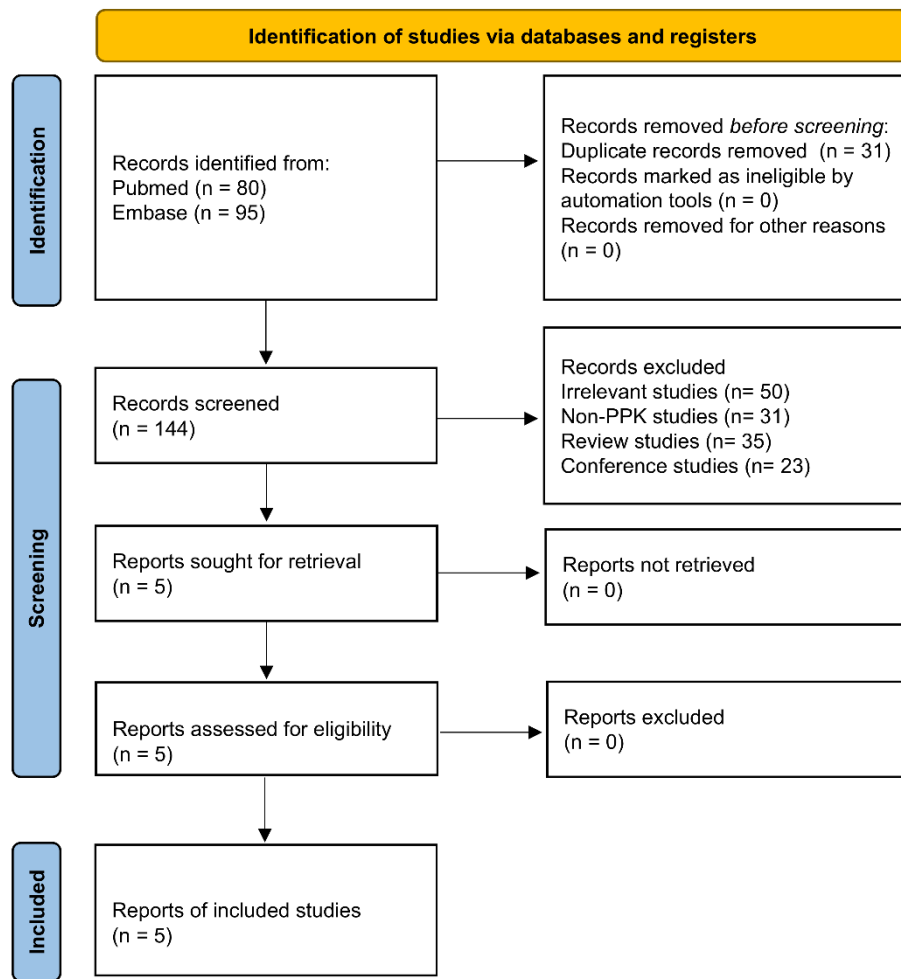

# PRISMA flow diagram for identifying population pharmacokinetic studies of perampanel

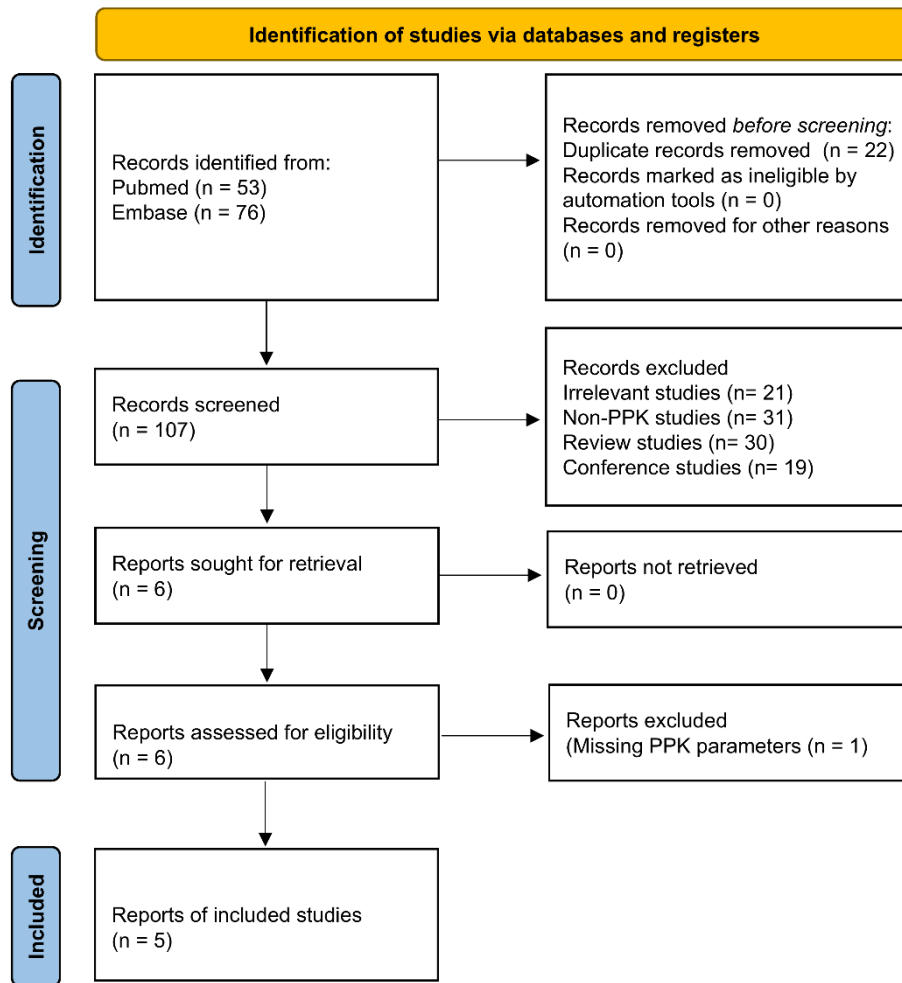

# PRISMA flow diagram for identifying population pharmacokinetic studies of Vigabitrin

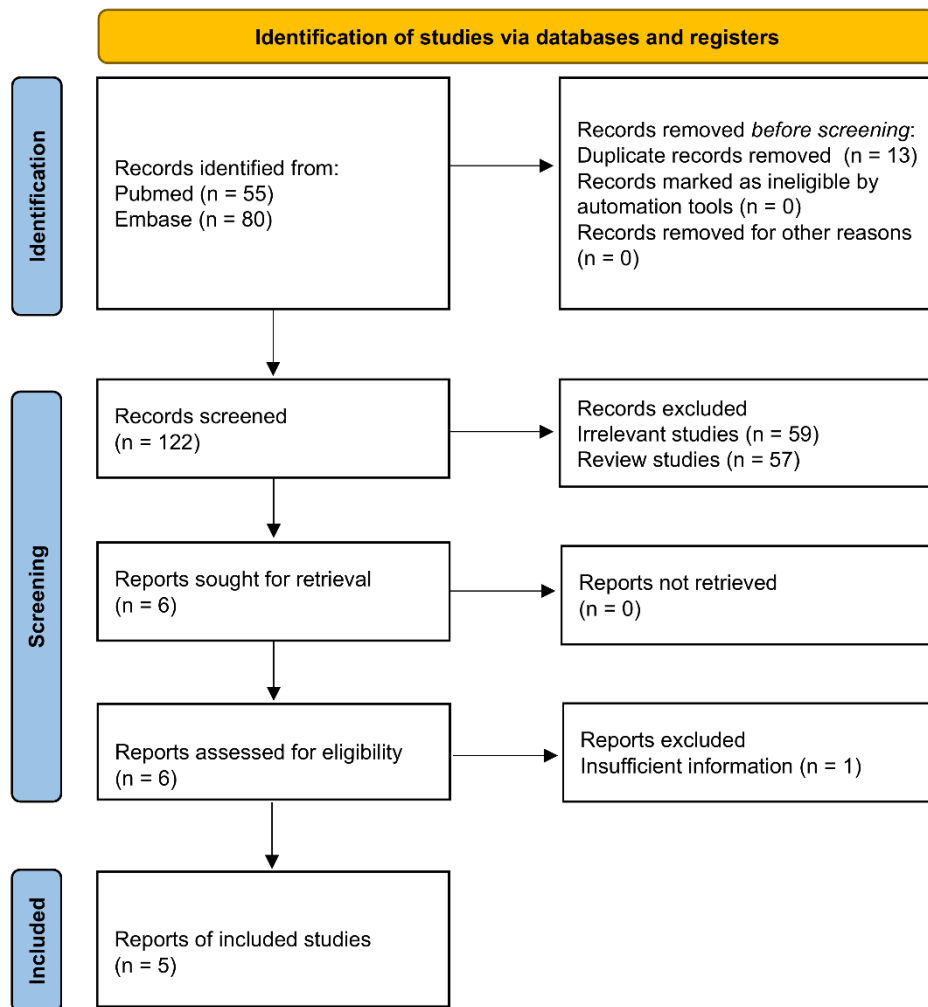

**Appendix 3. The identified population pharmacokinetic studies of antiseizure medications and corresponding dosing regimens.**

| <b>Drug</b>             | <b>Population</b> | <b>Model (year)</b>                           | <b>Dosing regimens</b> |
|-------------------------|-------------------|-----------------------------------------------|------------------------|
| Brivaracetam            | Children          | Schomaker et al. (2017) <sup>2</sup>          | 25 mg q12h             |
|                         | Adult             | Schomaker et al. (2016) <sup>3</sup>          | 50 mg q12h             |
| Carbamazepine           | Children          | Jiao et al. (2004) <sup>4</sup>               | 100 mg q12h            |
|                         | Adult             |                                               | 400 mg q12h            |
| Clobazam                | Children          | Saruwatari et al. (2014) <sup>5</sup>         | 5 mg q12h              |
|                         | Adult             |                                               | 10 mg q12h             |
| Eslicarbazepine acetate | Children          | Sunkaraneri et al. (2018) <sup>6</sup>        | 400 mg q24h            |
|                         | Adult             | Gidal et al. (2018) <sup>7</sup>              | 800 mg q24h            |
| Lacosamide              | Children          | Winkler et al. (2019) <sup>8</sup>            | 100 mg q12h            |
|                         | Adult             | Winkler et al. (2019) <sup>9</sup>            | 150 mg q12h            |
| Lamotrigine             | Children          | van Dijkman et al. (2018) <sup>10</sup>       | 50 mg q12h             |
|                         | Adult             |                                               | 100 mg q12h            |
|                         | Pregnant women    | Wang et al. (2021) <sup>11</sup>              | 100 mg q12h            |
| Levetiracetam           | Children          | Chhun et al. (2009) <sup>12</sup>             | 250 mg q12h            |
|                         | Adult             | Pigeolet et al. (2007) <sup>13</sup>          | 500 mg q12h            |
|                         | Pregnant women    | Li et al. (2023) <sup>14</sup>                | 500 mg q12h            |
| Oxcarbazepine           | Children          | Lin et al. (2019) <sup>15</sup>               | 300 mg q12h            |
|                         | Adult             | Lin et al. (2019) <sup>16</sup>               | 600 mg q12h            |
| Perampanel              | Children          | Li et al. (2024) <sup>17</sup>                | 4 mg q12h              |
|                         | Adult             | Takenaka et al. (2018) <sup>18</sup>          | 8 mg q12h              |
| Phenobarbital           | Children          | Goto et al. (2007) <sup>19</sup>              | 60 mg q12h             |
|                         | Adult             |                                               | 60 mg q12h             |
| Topiramate              | Children          | Girgisz et al. (2010) <sup>20</sup>           | 100 mg q12h            |
|                         | Adult             |                                               | 200 mg q12h            |
| Valproic acid           | Children          | Ding et al. (2015) <sup>21</sup>              | 250 mg q12h            |
|                         | Adult             | Teixeira-da-Silva et al. (2022) <sup>22</sup> | 500 mg q12h            |
| Vigabatrin              | Children          | Nielsen et al. (2014) <sup>23</sup>           | 1000 mg q24h           |
|                         | Adult             |                                               | 1500 mg q24h           |
| Zonisamide              | Children          | Okada et al. (2008) <sup>24</sup>             | 50 mg q12h             |
|                         | Adult             |                                               | 200 mg q12h            |

Children: 8 years old, 25 kg, 127 cm, eGFR 90 mL/min; adult: 40 years old, 70 kg, 180 cm, eGFR 90 mL/min; pregnant women, 25 years old, 70 kg, 160 cm, eGFR 90 mL/min, 30 weeks pregnant.

#### Appendix 4. Population pharmacokinetic parameter estimates of the identified ASMs studies.

| Drug (population)                 | Study (Publication year)               | Fixed effect parameters |                                                                                                                      | BSV (%)   | RUV          |
|-----------------------------------|----------------------------------------|-------------------------|----------------------------------------------------------------------------------------------------------------------|-----------|--------------|
| Brivaracetam (Children)           | Schoemaker et al. (2017) <sup>2</sup>  | <i>Ka</i>               | =1.84                                                                                                                | 31.9      | 23.4%        |
|                                   |                                        | CL <sup>(a)</sup>       | =3.63×(LBW/70) <sup>0.75</sup> × 1.479 <sup>CBZ</sup> × 1.408 <sup>PB</sup> × 0.899 <sup>VPA</sup>                   | 22.8      |              |
|                                   |                                        | V                       | =47.8×(LBW/50)                                                                                                       | 16.7      |              |
| Brivaracetam (Adults)             | Schoemaker et al. (2016) <sup>3</sup>  | <i>Ka</i>               | =1.42                                                                                                                | 101.2     | 20.7%        |
|                                   |                                        | CL                      | =3.63×(WT/70) <sup>0.565</sup> × 1.348 <sup>CBZ</sup> × 1.268 <sup>PHT</sup> × 1.239 <sup>PB</sup>                   | 24.7      |              |
|                                   |                                        | V                       | =48.1×(WT/70) <sup>0.639</sup>                                                                                       | 30.5      |              |
| Carbamazepine (Children & Adults) | Jiao et al. (2004) <sup>4</sup>        | <i>Ka</i>               | = 1.2                                                                                                                | /         | 14.46%       |
|                                   |                                        | CL                      | = 0.141 × DD <sup>0.406</sup> × WT <sup>0.117</sup> × 1.23 <sup>VPA</sup> × 1.44 <sup>PHT</sup> × 1.26 <sup>PB</sup> | 10.3      | 0.454 mg/L   |
|                                   |                                        | V                       | = 72                                                                                                                 | 42.9      |              |
| Clobazam (Children & Adults)      | Saruwatari et al. (2014) <sup>5</sup>  | <i>Ka</i>               | = 0.0594                                                                                                             | /         | 32.7 %       |
|                                   |                                        | CL <sup>(b)</sup>       | = 0.347 × WT <sup>0.54</sup> × 0.484 <sup>ZNS</sup> × 1.66 <sup>PB</sup> × 1.93 <sup>PHT</sup>                       | 81.8      |              |
|                                   |                                        | V                       | = 13.3 × WT <sup>0.136</sup>                                                                                         | /         |              |
| Eslicazepine acetate (Children)   | Sunkaraneni et al. (2018) <sup>6</sup> | <i>Ka</i>               | = 0.895 (tablet)<br>= 4.18 (oral suspension)                                                                         | 83.8<br>/ | 23.3 %       |
|                                   |                                        | CL                      | = 1.69 × (WT/33) <sup>0.75</sup> × (1 - 0.176 × LEV) × (1 + 0.6626 × PB)                                             | 25        |              |
|                                   |                                        | V                       | = 32.8 × WT/33                                                                                                       | 13.2      |              |
| Eslicazepine acetate (Adults)     | Gidal et al. (2018) <sup>7</sup>       | <i>Ka</i>               | = 2.34                                                                                                               | 126.49    | 11.1%        |
|                                   |                                        | CL                      | = (2.43 + 1.08 × (DCBZ/800) <sup>0.411</sup> + 1.24 × PBL + 0.0132 × (WT - 70)) × (eGFR/115.7) <sup>0.195</sup>      | 27.04     | 2.3 mg/L     |
|                                   |                                        | V                       | = (61.3 - 9.9 × SEXF + 12 × PBL) × (WT/70) <sup>0.617</sup>                                                          | 17.69     |              |
| Lacosamide (Children)             | Winkler et al. (2019) <sup>8</sup>     | <i>Ka</i>               | =2.45                                                                                                                | 55.1      | Not reported |
|                                   |                                        | CL                      | =2.37×(WT/70) <sup>0.624</sup> × 1.535 <sup>IND</sup>                                                                | 32.3      |              |
|                                   |                                        | V                       | =50.6×(WT/70)                                                                                                        | 24        |              |

#### Appendix 4. continued

| Drug<br>(population)                 | Study (Publication year)                   | Fixed effect parameters |                                                                                                                                                                                                              | BSV (%)                                                                                   | RUV                 |
|--------------------------------------|--------------------------------------------|-------------------------|--------------------------------------------------------------------------------------------------------------------------------------------------------------------------------------------------------------|-------------------------------------------------------------------------------------------|---------------------|
| Lacosamide<br>(Adults)               | Winkler et al. (2019) <sup>9</sup>         | $Ka$                    | =4.05                                                                                                                                                                                                        | 70.9                                                                                      | 50%                 |
|                                      |                                            | $CL$                    | $=2.57 \times (WT/70)^{0.75} \times 1.50^{CBZ} \times 2.59^{PB} \times 1.56^{PHT}$                                                                                                                           | 23.0                                                                                      |                     |
|                                      |                                            | $V_c$                   | $=28.2 \times (WT/70)^{0.722}$                                                                                                                                                                               | 35.6                                                                                      |                     |
|                                      |                                            | $V_p$                   | =13.1                                                                                                                                                                                                        | 55.0                                                                                      |                     |
|                                      |                                            | $Q$                     | =39.1                                                                                                                                                                                                        | /                                                                                         |                     |
|                                      |                                            | $F$                     | =1.01                                                                                                                                                                                                        | 3.8                                                                                       |                     |
|                                      |                                            | $D1$                    | =0.401                                                                                                                                                                                                       | 58.0                                                                                      |                     |
| Lamotrigine<br>(Adult &<br>Children) | Van Dijkman et al.<br>(2018) <sup>10</sup> | $Ka$                    | = 2.43 (immediate-release formulation)<br>= 0.087 (extended-release formulation)                                                                                                                             | 60.9<br>(immediate-<br>release<br>formulation)<br>46(extended-<br>release<br>formulation) | 15.6%<br>0.236 mg/L |
|                                      |                                            | $CL^{(c)}$              | $= 2.23 \times (WT/70)^{0.75} \times 1.765^{CBZ} \times 2.29^{PHT} \times 0.526^{VPA}$<br>$= 2.23 \times (WT/70)^{0.75} \times 1.765^{CBZ} \times 2.29^{PHT} \times 0.526^{VPA} \times 0.852$ (if >65 years) | 27.4%                                                                                     |                     |
|                                      |                                            | $V$                     | $= 1.97 \times (WT/70)^{0.75}$                                                                                                                                                                               | 62.6%                                                                                     |                     |
| Lamotrigine<br>(Pregnant women)      | Wang et al. (2021) <sup>11</sup>           | $Ka$                    | = 1.93                                                                                                                                                                                                       | /                                                                                         | 30.6 %              |
|                                      |                                            | $CL$                    | $= 3.30 \times \left(\frac{GA}{9}\right)^{0.347} \times (1 - 0.507 \times INH)$                                                                                                                              | 37.7                                                                                      | 0.032 mg/L          |
|                                      |                                            | $V$                     | = 68.8                                                                                                                                                                                                       | /                                                                                         |                     |

#### Appendix 4. continued

| Drug<br>(population)              | Study (Publication year)             | Fixed effect parameters |                                                                                                                    | BSV (%) | RUV                 |
|-----------------------------------|--------------------------------------|-------------------------|--------------------------------------------------------------------------------------------------------------------|---------|---------------------|
| Levetiracetam<br>(Children)       | Chhun et al. (2009) <sup>12</sup>    | $Ka$                    | = 3.83                                                                                                             | 117     | 18.90 %<br>COR=16.7 |
|                                   |                                      | $Tlag$                  | = 0.283                                                                                                            |         |                     |
|                                   |                                      | $CL$                    | = $2.47 \times (WT/33)^{0.89}$                                                                                     | 24.3    |                     |
|                                   |                                      | $V$                     | = $21.9 \times (WT/33)^{0.93}$                                                                                     | 16.3    |                     |
| Levetiracetam<br>(Adults)         | Pigeolet et al. (2007) <sup>13</sup> | $Ka$                    | = 2.44 (fed)<br>= 4.80 (fasted)                                                                                    | 108     | 27.5 %              |
|                                   |                                      | $CL$                    | = $4.02 \times (WT/70)^{0.268} \times (eGFR/110)^{0.122} \times 0.896^{SEXF} \times 1.09^{IND} \times 0.812^{VPA}$ | 19.5    |                     |
|                                   |                                      | $V$                     | = $52.7 \times (WT/70)^{0.952}$                                                                                    | 11.8    |                     |
| Levetiracetam<br>(Pregnant women) | Li et al. (2023) <sup>14</sup>       | $Ka$                    | = 2.44                                                                                                             | /       | 36.1%               |
|                                   |                                      | $CL$                    | = $3.82 \times (WT/65)^{0.939} \times 1.22$ (if pregnant 14~28 weeks)<br>$\times 1.15$ (if pregnant >28 weeks)     | 18.9    |                     |
|                                   |                                      | $V$                     | = 42                                                                                                               | /       |                     |
| Oxcarbazepine<br>(Children)       | Lin et al. (2019) <sup>15</sup>      | $Ka$                    | = 0.83                                                                                                             | 11.1    | 2.992 mg/L          |
|                                   |                                      | $CL$                    | = $1.68 \times (WT/70)^{(0.624 - (0.233 \times WT^{219})/(8.97^{219} + WT^{219}))}$                                |         |                     |
|                                   |                                      | $V$                     | = 14.7                                                                                                             |         |                     |
| Oxcarbazepine<br>(Adults)         | Lin et al. (2019) <sup>16</sup>      | $Ka$                    | = 0.46                                                                                                             | /       | 24.5 %              |
|                                   |                                      | $CL$                    | = $2 \times (WT/70)^{0.46} \times (eGFR/80)^{0.741}$                                                               | 12.7    |                     |
|                                   |                                      | $V$                     | = 102                                                                                                              | 58.7    |                     |
| Perampanel<br>(Children)          | Li et al. (2024) <sup>17</sup>       | $Ka$                    | = 1.19                                                                                                             | /       | 17.25%              |
|                                   |                                      | $CL$                    | = $0.59 \times (WT/70)^{0.51} \times (TBIL/5.9)^{-0.24} \times 1.53^{OXC}$                                         | 44.7    |                     |
|                                   |                                      | $V$                     | = $97.27 \times (WT/70)$                                                                                           | 97.5    |                     |



Appendix 4. continued

| Drug (Age group)                  | Study (Publication year)                      | Fixed effect parameters                                                                                                                                                     | BSV (%) | RUV                    |
|-----------------------------------|-----------------------------------------------|-----------------------------------------------------------------------------------------------------------------------------------------------------------------------------|---------|------------------------|
| Perampanel (Adults)               | Takenaka et al. (2017) <sup>18</sup>          | $Ka^{(d)} = 1.19$                                                                                                                                                           | /       | 8.72%                  |
|                                   |                                               | $CL^{(e)} = 0.668 \times (ALT/17)^{-0.0901} \times 0.822^{SEXF} \times 0.908^{Asian} \times 2.95^{CBZ} \times 1.99^{OXC/PHT} \times 1.21^{TOP/PB}$                          | 43.5    |                        |
|                                   |                                               | $V = 43.5$                                                                                                                                                                  | 51.5    |                        |
| Phenobarbital (Children & Adults) | Goto et al. (2007) <sup>19</sup>              | $Ka = 2$                                                                                                                                                                    | /       | 3.49 mg/L              |
|                                   |                                               | $CL^{(b)} = 0.223 \times (WT/40)^{0.21} \times 0.68^{VPA} \times 0.85^{PHT}$                                                                                                | 17.3    |                        |
|                                   |                                               | $V = 14.78$                                                                                                                                                                 | 171.2   |                        |
| Topiramate (Children & Adults)    | Girgis et al. (2010) <sup>20</sup>            | $Ka = 0.105$                                                                                                                                                                | 22.34   | 25.46 %<br>0.1797 mg/L |
|                                   |                                               | $K_{23} = 0.577$                                                                                                                                                            | /       |                        |
|                                   |                                               | $K_{32} = 0.0586$                                                                                                                                                           | /       |                        |
|                                   |                                               | $CL = 1.21 \times (WT/69.9)^{0.453} \times e^{(-0.00306 \times (Age - 31.4))} \times 0.686^{VPA} \times 1.94^{IND}$                                                         | 27.28   |                        |
|                                   |                                               | $V = 4.61 \times (WT/69.9)^{1.14}$                                                                                                                                          | 116.2   |                        |
| Valproic acid (Children)          | Ding et al. (2015) <sup>21</sup>              | $Ka = 2.64$ (syrup)<br>$= 1.57$ (tablet)                                                                                                                                    | /       | 13.3 mg/L              |
|                                   |                                               | $CL = 0.3 \times 1.43^{CBZ} \times (WT/70)^{(0.791 - 0.096 \times Age^{8.63} / (0.802^{8.63} + Age^{8.63}))} \times (1 + 2.8 \times DD^{1.68} / (37.4^{1.68} + DD^{1.68}))$ | 19.5%   |                        |
|                                   |                                               | $V = 22.2 \times (WT/70)$                                                                                                                                                   | /       |                        |
| Valproic acid (Adults)            | Teixeira-da-Silva et al. (2022) <sup>22</sup> | $Ka^{(g)} = 2.64$ (oral solution)<br>$= 0.78$ (gastro-resistant tablets)<br>$= 0.38$ (modified-release coated tablets)                                                      | /       | 8.5 mg/L               |
|                                   |                                               | $CL = 0.1 \times (WT/60)^{0.7} \times DD^{0.2} \times 1.36^{CBZ} \times 1.25^{PHT} \times 1.11^{PB}$                                                                        | 18      |                        |
|                                   |                                               | $V = 0.14 \times WT$                                                                                                                                                        | /       |                        |
|                                   |                                               |                                                                                                                                                                             |         |                        |

#### Appendix 4. continued

| Drug (Age group)                  | Study (Publication year)                | Fixed effect parameters |                                                                                                        | BSV (%) | RUV                  |
|-----------------------------------|-----------------------------------------|-------------------------|--------------------------------------------------------------------------------------------------------|---------|----------------------|
| Vigabatrin<br>(Children & Adult)  | Nielsen et al. (2014) <sup>23 (h)</sup> | CL                      | $=6.52 \times (eGFR/100)^{0.538} \times 0.525$ (for children aged 3-16 years)                          | /       | 93.3% <sup>(i)</sup> |
|                                   |                                         | $V_c$                   | $= 23.9 \times (WT/70)^{0.406}$                                                                        | 18.2%   |                      |
|                                   |                                         | $k$                     | $= CL/V_c$                                                                                             | 14.5%   |                      |
|                                   |                                         | $V_p$                   | $= 32.3 \times (WT/70)^{1.03}$                                                                         | /       |                      |
|                                   |                                         | $Q$                     | $= 3.59 \times (WT/70)^{0.692}$                                                                        | /       |                      |
|                                   |                                         | $k_{tr}$                | $= 11.4 \times (Age/28)^{0.3}$                                                                         | 22.9%   |                      |
|                                   |                                         | $F$                     | $= 1$                                                                                                  | /       |                      |
|                                   |                                         | $n$                     | $= 5$                                                                                                  | /       |                      |
| Zonisamide<br>(Children & Adults) | Okada et al. (2008) <sup>24</sup>       | $K_a$                   | $= 2$                                                                                                  | /       | 22.4 %               |
|                                   |                                         | $CL^{(b)}$              | $= 1.065 \times (WT/44)^{0.77} \times DD^{-0.17} \times 1.24^{CBZ} \times 1.28^{PHT} \times 1.29^{PB}$ | 27.6    |                      |
|                                   |                                         | $V$                     | $= 1.23 \times WT$                                                                                     | /       |                      |

*ALT* Alanine Aminotransferase (IU/L); *AGE* age of patients (year); *CBZ* carbamazepine; *CL* apparent clearance (L/h); *COR* covariance between CL and V; *DI* duration for zero-order absorption (h); *DCBZ* Carbamazepine daily dose (mg); *DD* daily dose (mg/day); *eGFR* estimated glomerular filtration rate (mL/min/1.73m<sup>2</sup>), *F* absorption rate; *GA* gestational age (weeks); *IND* enzyme-inducing antiepileptic drugs; *k* elimination rate constant (h<sup>-1</sup>); *K<sub>a</sub>* absorption rate constant (h<sup>-1</sup>); *KM* Michaelis constant; *K<sub>23</sub>* inter-compartment rate constants from central to peripheral compartment (h<sup>-1</sup>); *K<sub>32</sub>* inter-compartment rate constants from peripheral to central compartment (h<sup>-1</sup>); *k<sub>tr</sub>* transit rate constant (h<sup>-1</sup>); *LBW* lean body weight (kg); *LEV* levetiracetam; *n* number of transit compartments; *OXC* oxcarbazepine; *PB* phenobarbital; *PBL* Phenobarbital-like AEDs including phenytoin and primidone; *PHT* phenytoin; *Q* inter-compartment clearance between the central and peripheral compartment; *SEXF* 1 for female and 0 for male; *TBIL* total bilirubin; *Tlag* absorption lag time (h); *TOP* topiramate; *V* apparent volume of distribution (L); *V<sub>c</sub>* apparent volume of distribution of the central compartment (L); *VM* maximum reaction velocity; *V<sub>p</sub>* apparent volume of distribution of the peripheral compartment (L); *VPA* valproate acid; *WT* body weight (kg); *ZNS* zonisamide.

(a) For males:  $LBW = 1.1 \times WT - 0.0128 \times (WT/HT/100)^2$ , for females:  $LBW = 1.07 \times WT - 0.0148 \times (WT/HT/100)^2$ , where WT is weight (kg), HT is height (cm).

(b) The original equation contains the effect of genotype, and the equation used in the dashboard has been normalized according to gene frequency reported in the original literature.

(c) CL for patients aged <2 years is not included in the dashboard.

(d) The *K<sub>a</sub>* was fixed from another study conducted in children <sup>17</sup>.

(e) Asian=0, if Japanese, Chinese and non-Asian; Asian=1, if Asians except for Japanese and Chinese. In the dashboard, the CL for Japanese, Chinese and non-Asian

was defaulted.

- (f) The  $Ka$  was fixed from another study conducted in healthy volunteers <sup>25</sup>.
- (g) In the dashboard, absorption rate for modified-release coated tablets was applied.
- (h) The model is simplified as a two-compartment model with first-order absorption and elimination when developing the dashboard to shorten the calculation time.
- (i) The residual unexplained variability in study 118 was applied.

## Appendix 5. The posterior probabilities-concentration curves of brivaracetam.

(a) Adult: 40 years, 70 kg, 180 cm, taking brivaracetam 50 mg q12h; (b) children: 8 years, 25 kg, 127cm, taking brivaracetam 25 mg q12h.

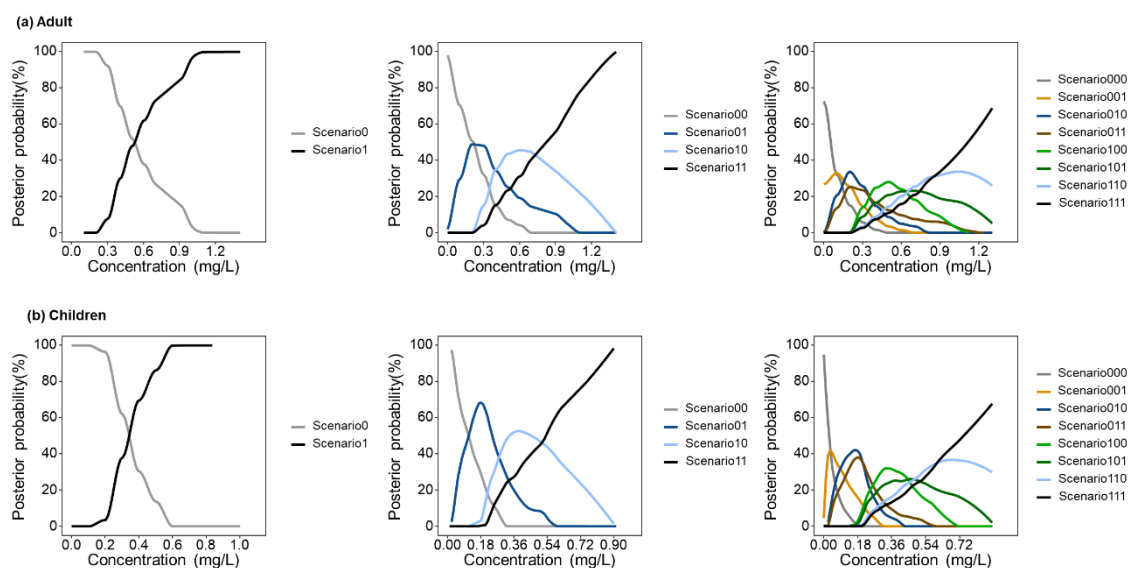

## Appendix 6. The posterior probabilities-concentration curves of carbamazepine.

Adult: 40 years, 70 kg, 180 cm, taking carbamazepine 400 mg q12h; children: 8 years, 25 kg, 127cm, taking carbamazepine 100 mg q12h.

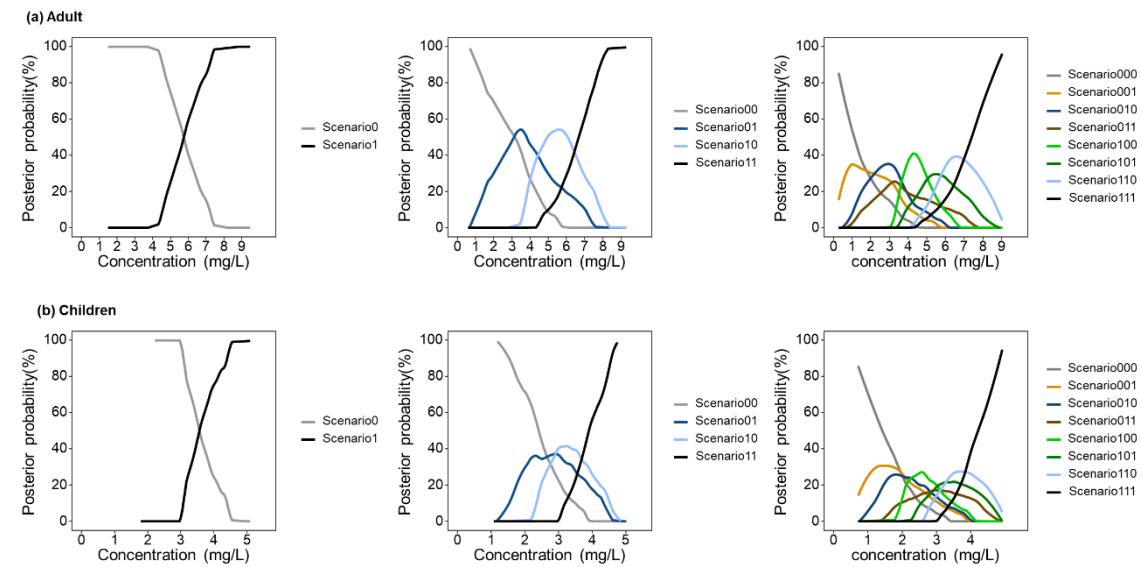

## Appendix 7. The posterior probabilities-concentration curves of clobazam.

Adult: 40 years, 70 kg, 180 cm, taking clobazam 10 mg q12h; children: 8 years, 25 kg, 127cm, taking clobazam 5 mg q12h.

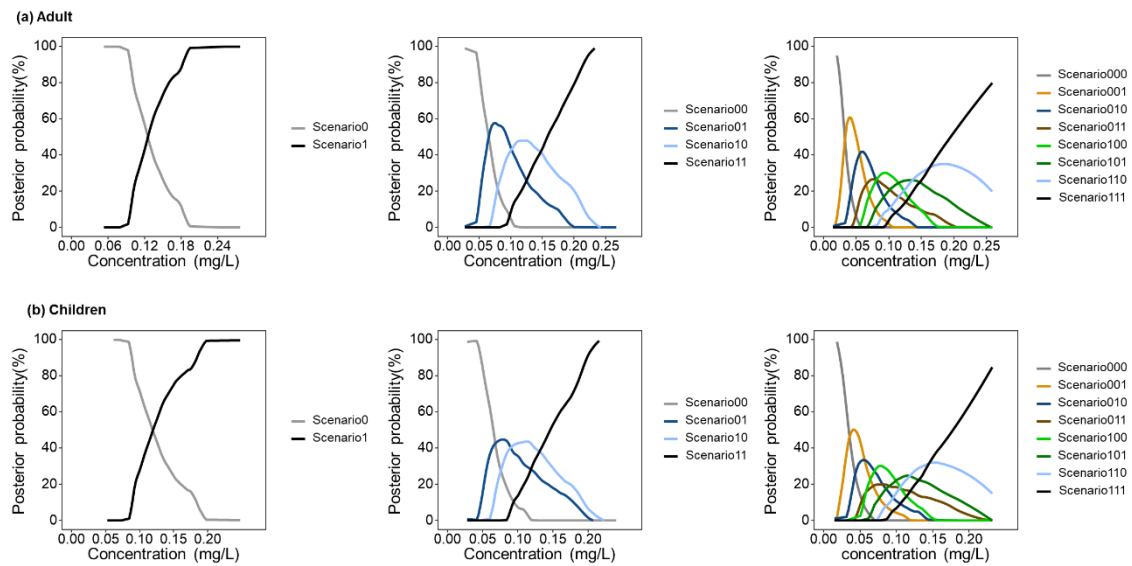

## Appendix 8. The posterior probabilities-concentration curves of eslicarbazepine acetate.

Adult: 40 years, 70 kg, 180 cm, taking eslicarbazepine acetate tablet 800 mg q24h; children: 8 years, 25 kg, 127cm, taking eslicarbazepine acetate tablet 400 mg q24h.

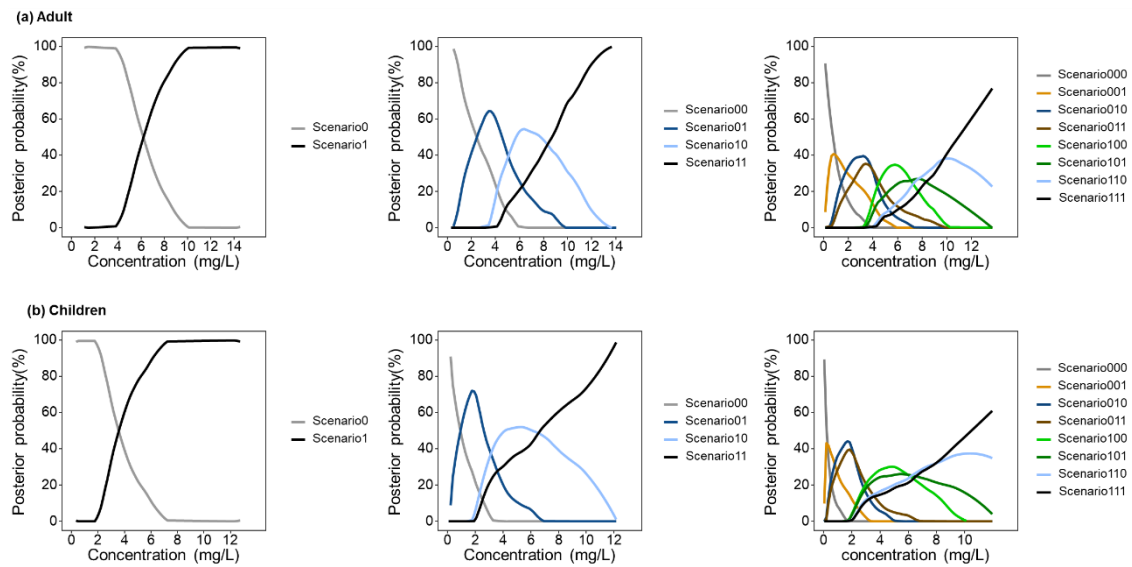

## Appendix 9. The posterior probabilities-concentration curves of lacosamide.

Adult: 40 years, 70 kg, 180 cm, taking lacosamide 150 mg q12h; children: 8 years, 25 kg, 127cm, taking lacosamide 100 mg q12h.

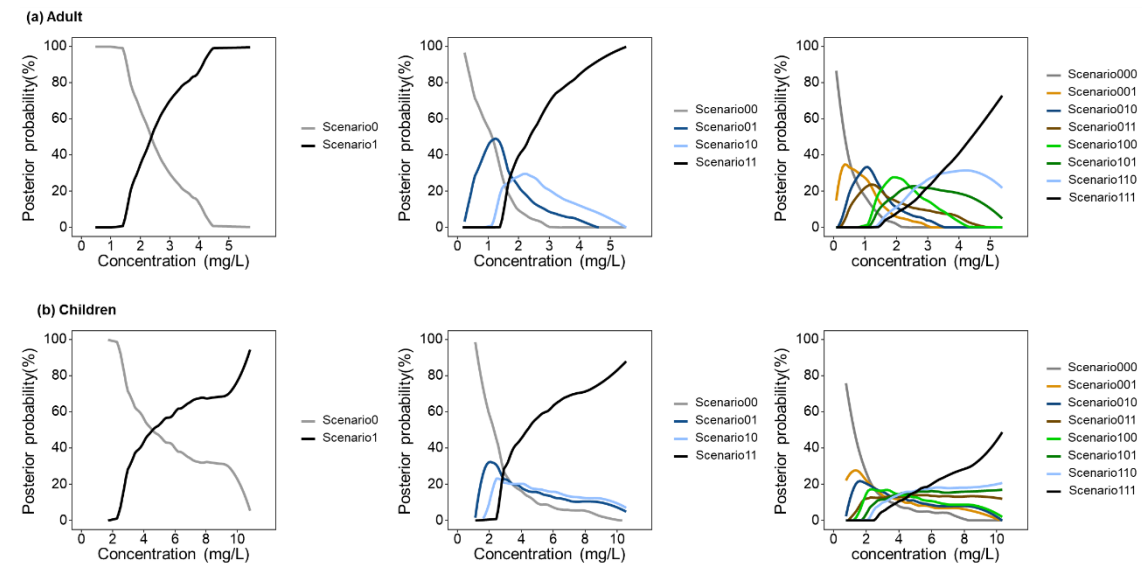



## Appendix 10. The posterior probabilities-concentration curves of lamotrigine.

Adult: 40 years, 70 kg, 180 cm, taking lamotrigine 100 mg q12h; children: 8 years, 25 kg, 127cm, taking lamotrigine 50 mg q12h; pregnant women, 25 years, 70 kg, 160 cm, being 30 weeks pregnant, taking lamotrigine 100 mg q12h.

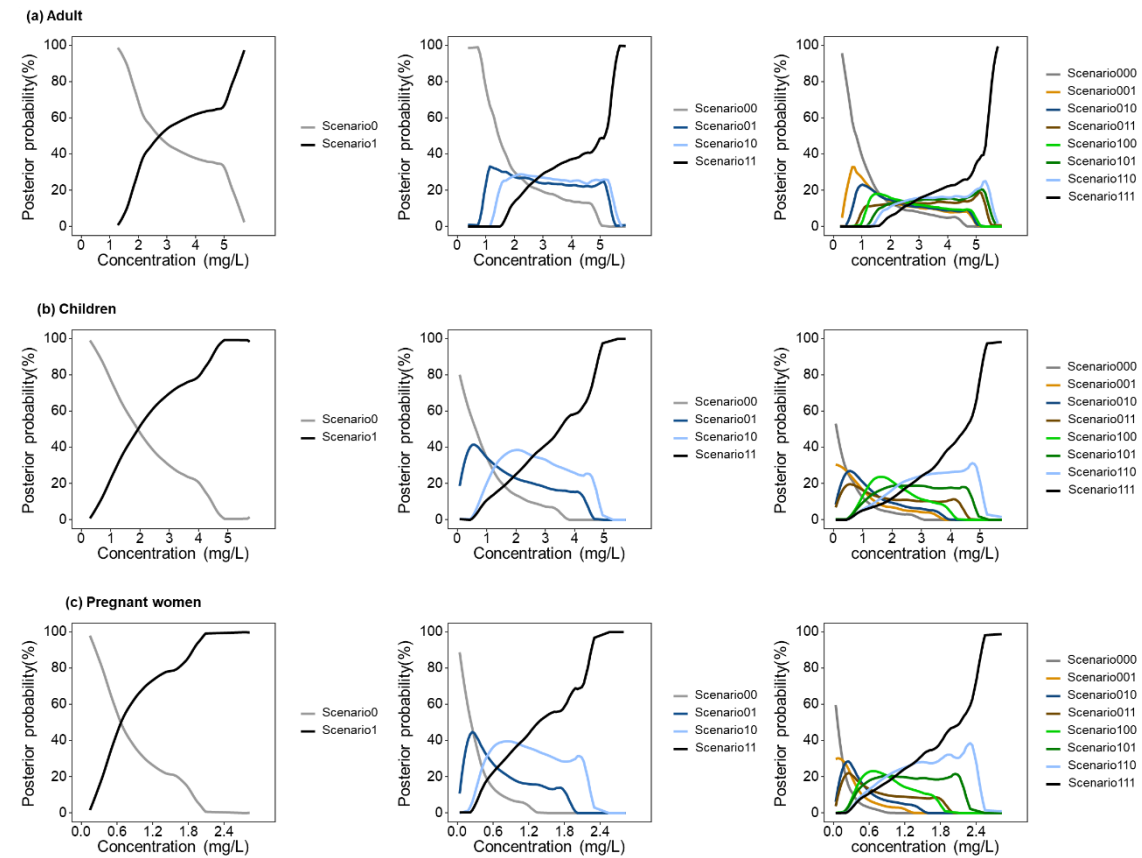

## Appendix 11. The posterior probabilities-concentration curves of levetiracetam.

Adult: 40 years, 70 kg, 180 cm, taking levetiracetam 500 mg q12h; children: 8 years, 25 kg, 127cm, taking levetiracetam 250 mg q12h; pregnant women, 25 years, 70 kg, 160 cm, being 30 weeks pregnant, taking levetiracetam 500 mg q12h.

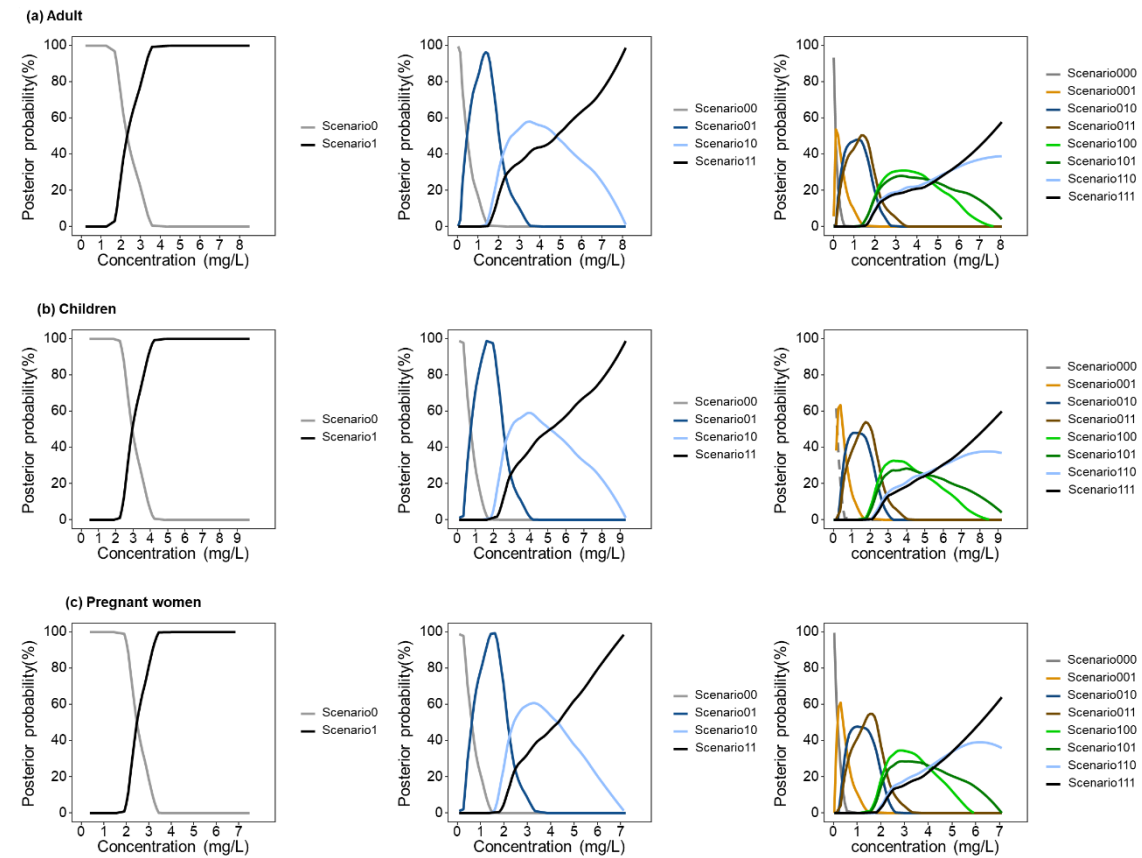

## Appendix 12. The posterior probabilities-concentration curves of oxcarbazepine.

Adult: 40 years, 70 kg, 180 cm, taking oxcarbazepine 600 mg q12h; children: 8 years, 25 kg, 127cm, taking oxcarbazepine 300 mg q12h.

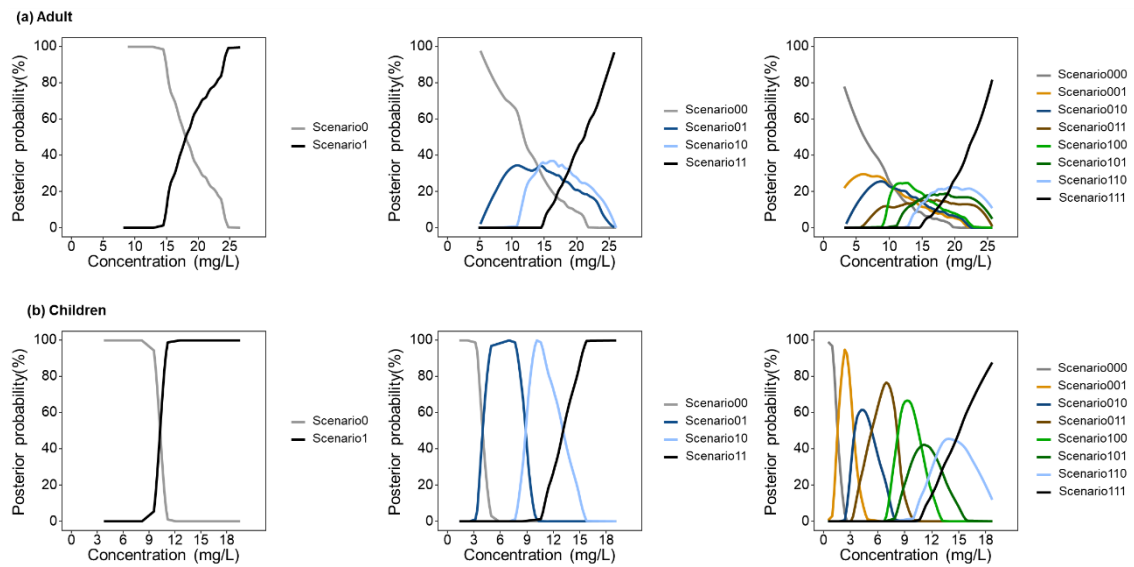

### Appendix 13. The posterior probabilities-concentration curves of perampanel.

Adult: 40 years, 70 kg, 180 cm, taking perampanel 8 mg q24h; children: 8 years, 25 kg, 127cm, taking perampanel 4 mg q24h.

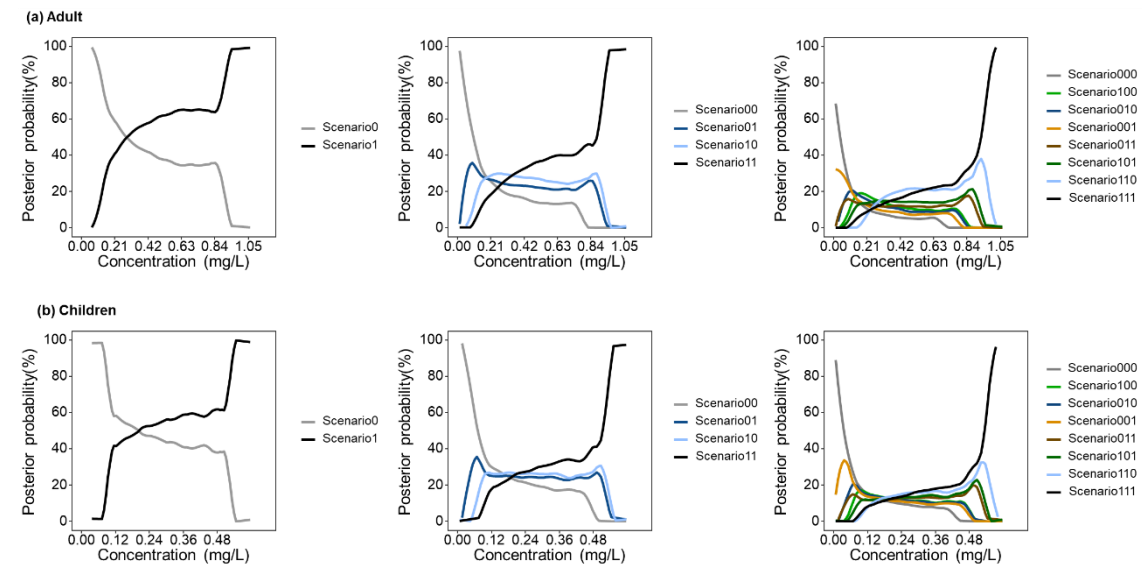

#### Appendix 14. The posterior probabilities-concentration curves of phenobarbital.

Adult: 40 years, 70 kg, 180 cm, taking phenobarbital 60 mg q12h; children: 8 years, 25 kg, 127cm, taking phenobarbital 60 mg q12h.

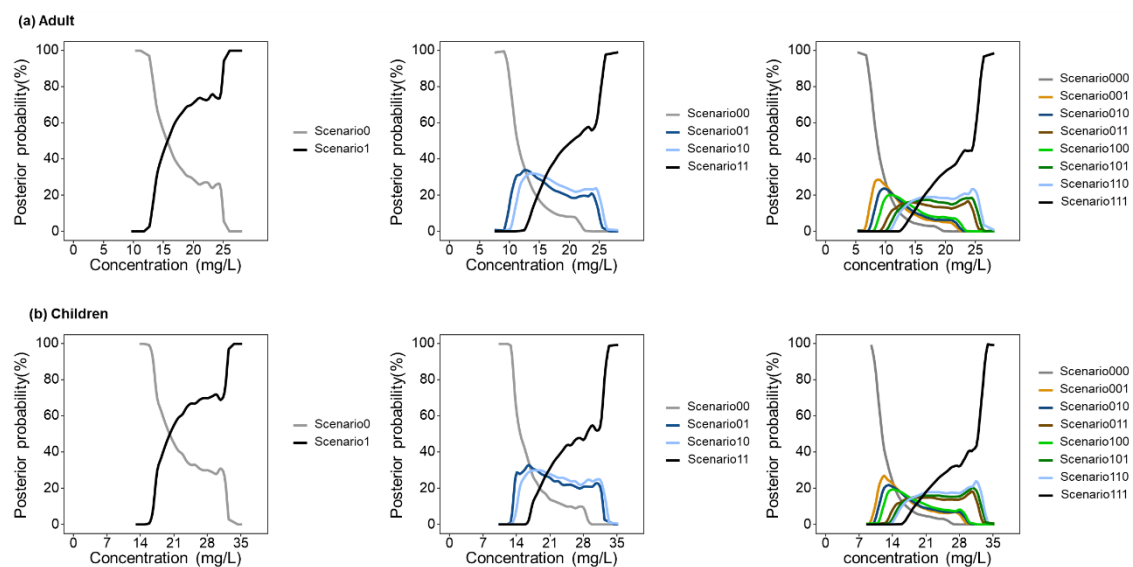

## Appendix 15. The posterior probabilities-concentration curves of topiramate.

Adult: 40 years, 70 kg, 180 cm, taking topiramate 200 mg q12h; children: 8 years, 25 kg, 127cm, taking topiramate 100 mg q12h.

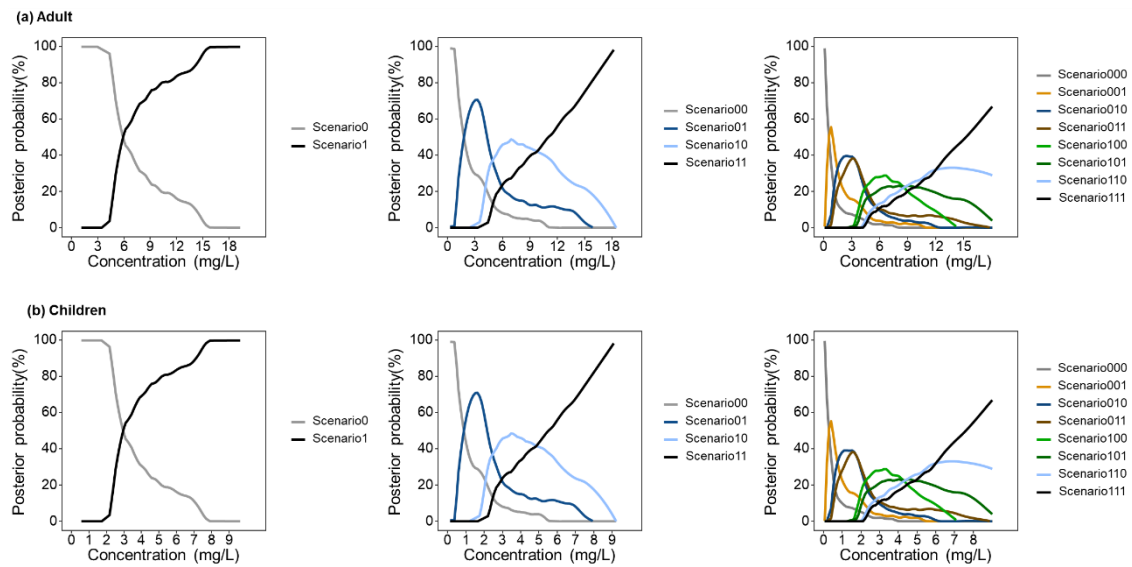

## Appendix 16. The posterior probabilities-concentration curves of valproic acid.

Adult: 40 years, 70 kg, 180 cm, taking valproic acid 500 mg q12h; children: 8 years, 25 kg, 127cm, taking valproic acid 250 mg q12h.

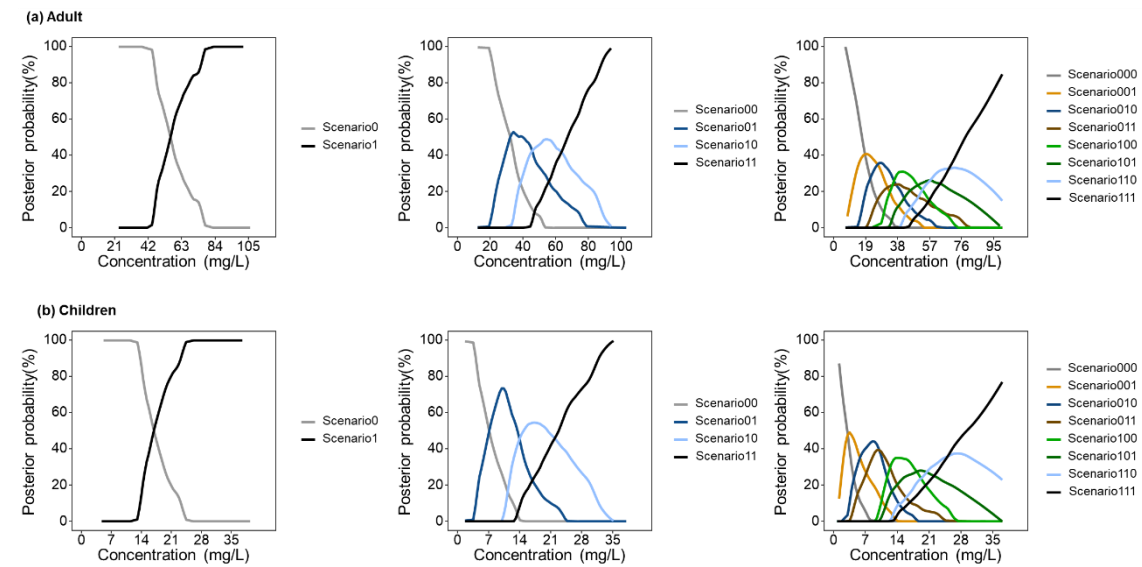

## Appendix 17. The posterior probabilities-concentration curves of vigabatrin.

Adult: 40 years, 70 kg, 180 cm, taking vigabatrin 1500 mg q24h; children: 8 years, 25 kg, 127cm, taking vigabatrin 1000 mg q24h.

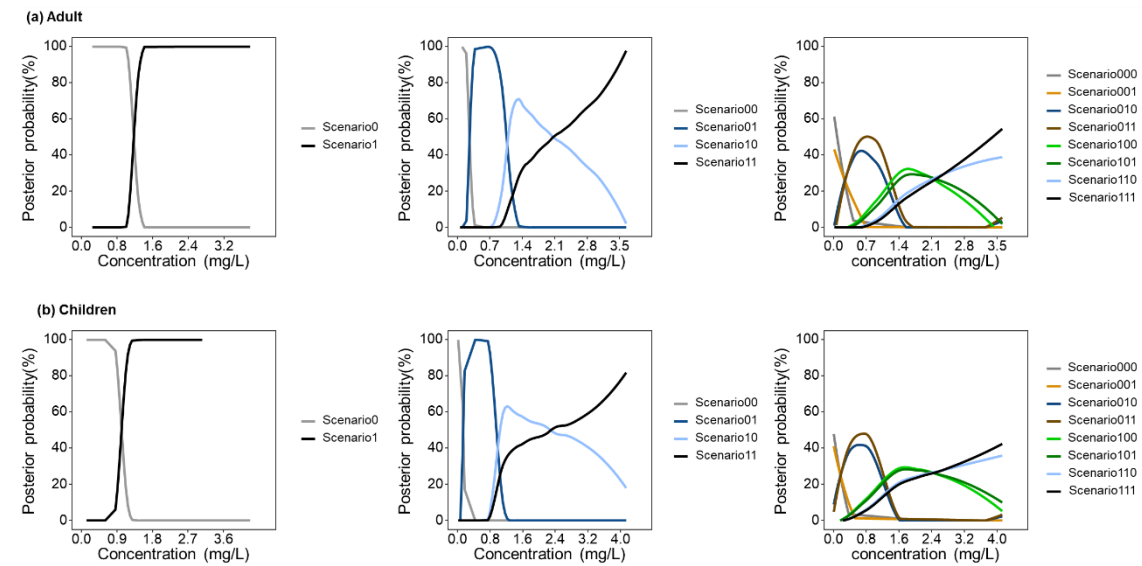



## Appendix 18. The posterior probabilities-concentration curves of zonisamide.

Adult: 40 years, 70 kg, 180 cm, taking zonisamide 200 mg q12h; children: 8 years, 25 kg, 127cm, taking zonisamide 50 mg q12h.

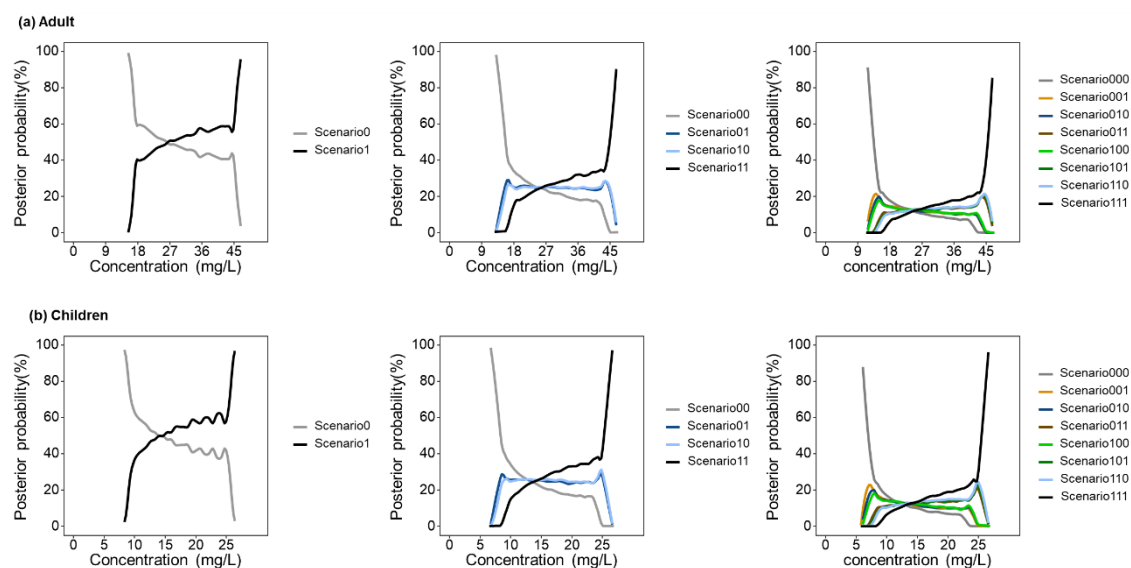

## Appendix 19. Effect of renal function on the distinguishability of different dosing scenarios.

The virtual patients are adult, 40 years, 70 kg, taking levetiracetam tablet 500 mg q12h.

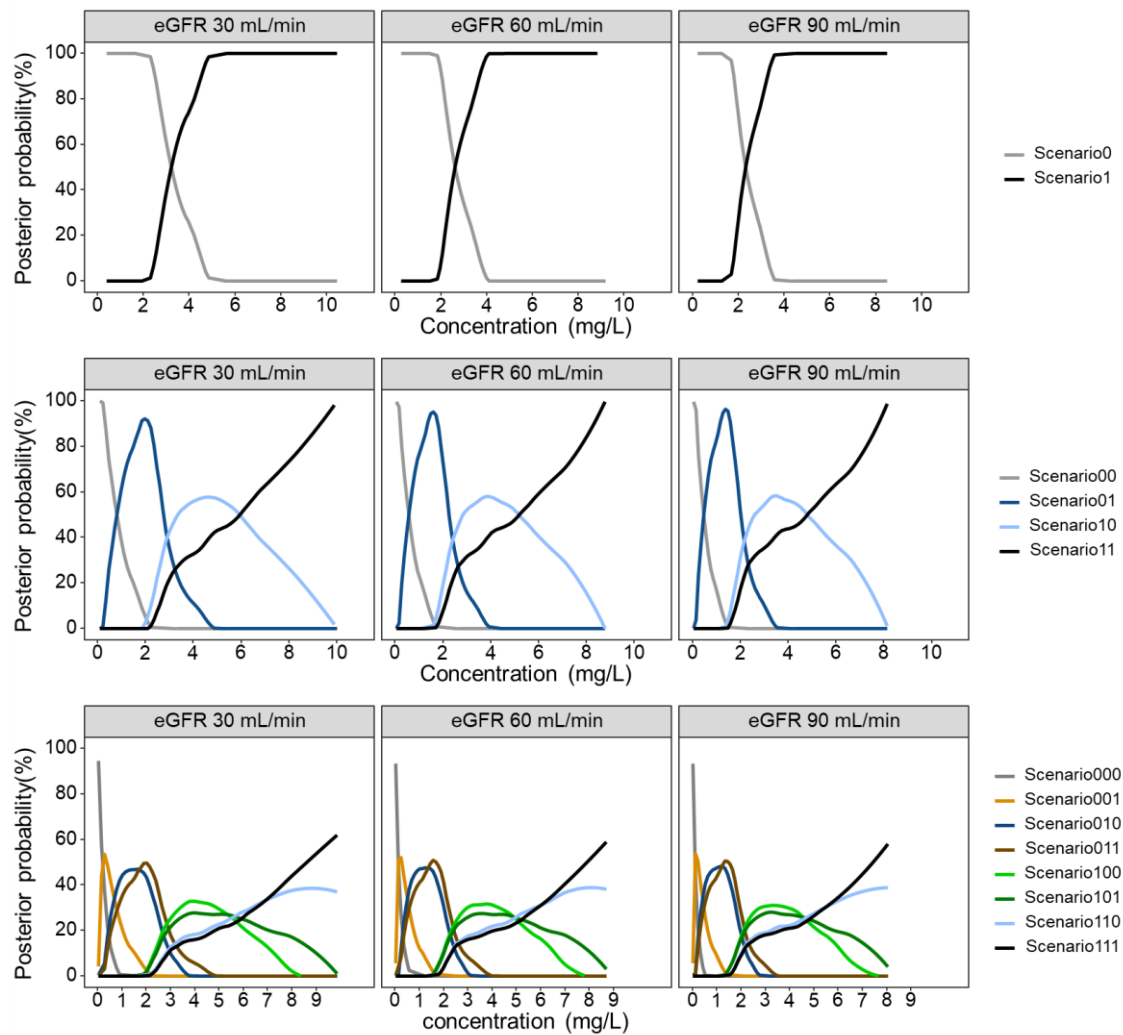

## Appendix 20. Effect of concomitant medicine on the distinguishability of different dosing scenarios.

The virtual patients are adult, 40 years, 70 kg, CrCl 90 mL/min, taking lamotrigine tablet 100 mg q12h, or topiramate 200 mg q12h.

(a) Lamotrigine

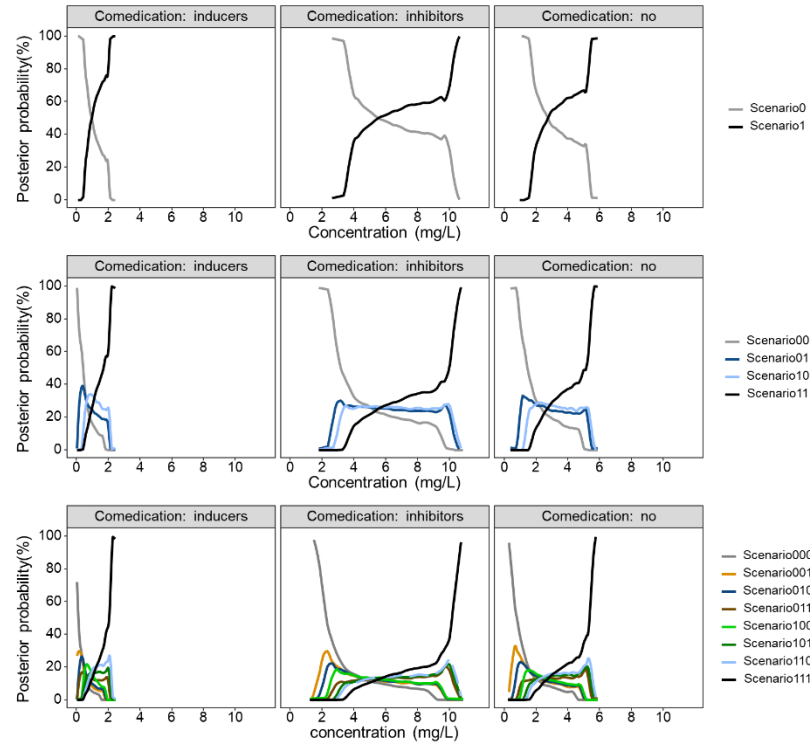

(b) Topiramate

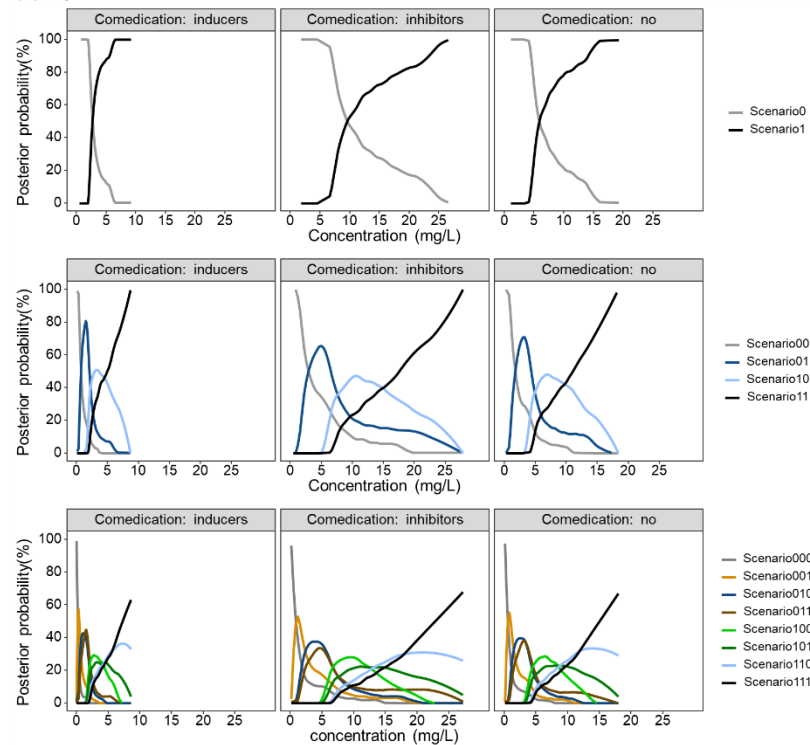

## Appendix 21. Effect of sampling time on the distinguishability of dosing behaviors.

The virtual patients are adult, 40 years, 70 kg, 180 cm, taking levetiracetam tablet 500 mg q12h.

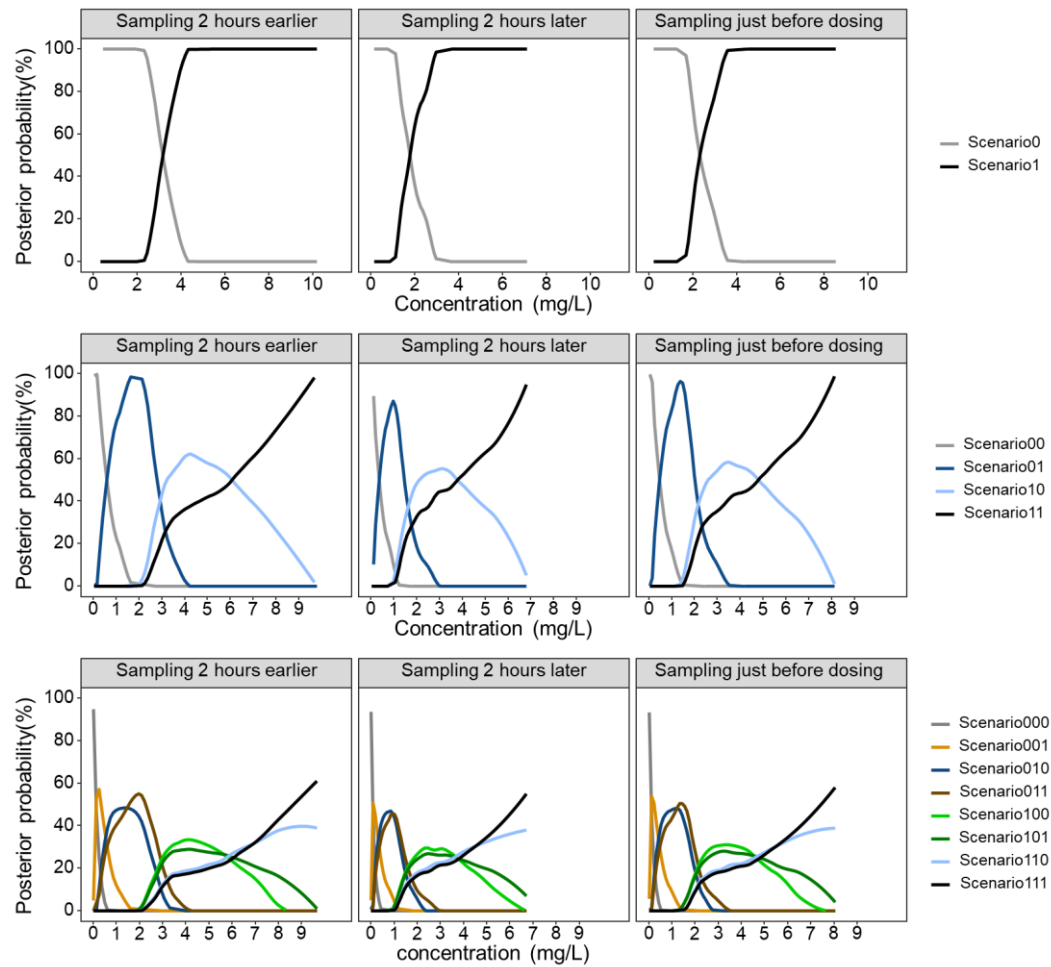

## Appendix 22. Effect of dosing interval on the distinguishability of dosing behaviors.

The virtual patients are adult, 40 years, 70 kg, 180 cm, taking valproic acid 500 mg q12h, or 1000 mg q24h; or taking lamotrigine 100 mg q12h, or 200 mg q24h.

(a) Valproic acid

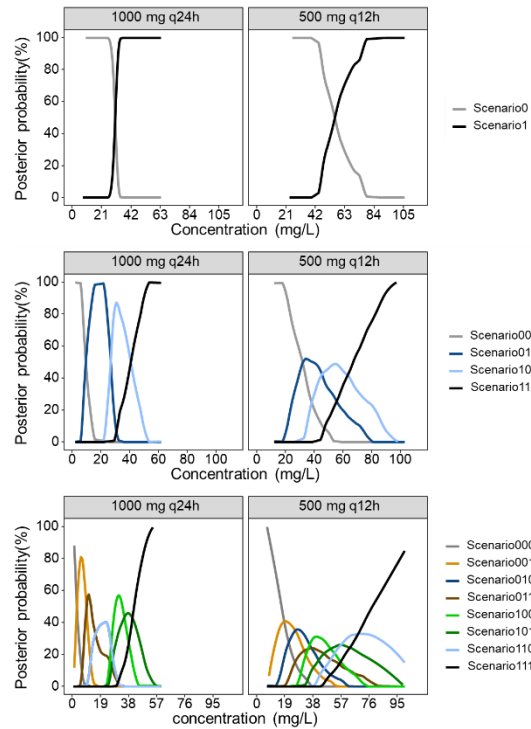

(b) Valproic acid

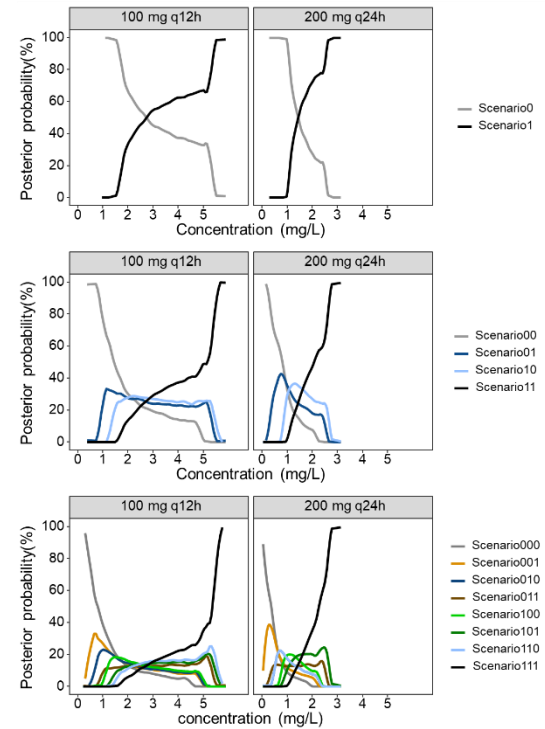

## Appendix 23. Effect of prior probability on the distinguishability of dosing behaviors.

The virtual patients are adult, 40 years, 70 kg, 180 cm, taking levetiracetam 500 mg q12h, or topiramate 200 mg q12h.

### (a) Levetiracetam

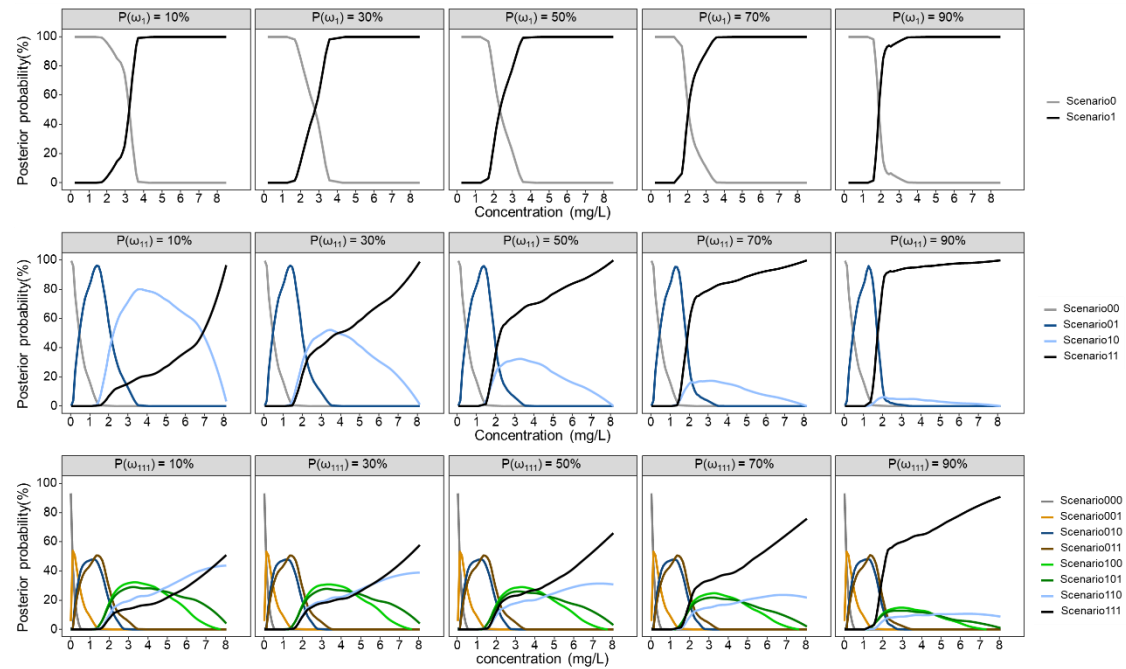

### (b) Topiramate

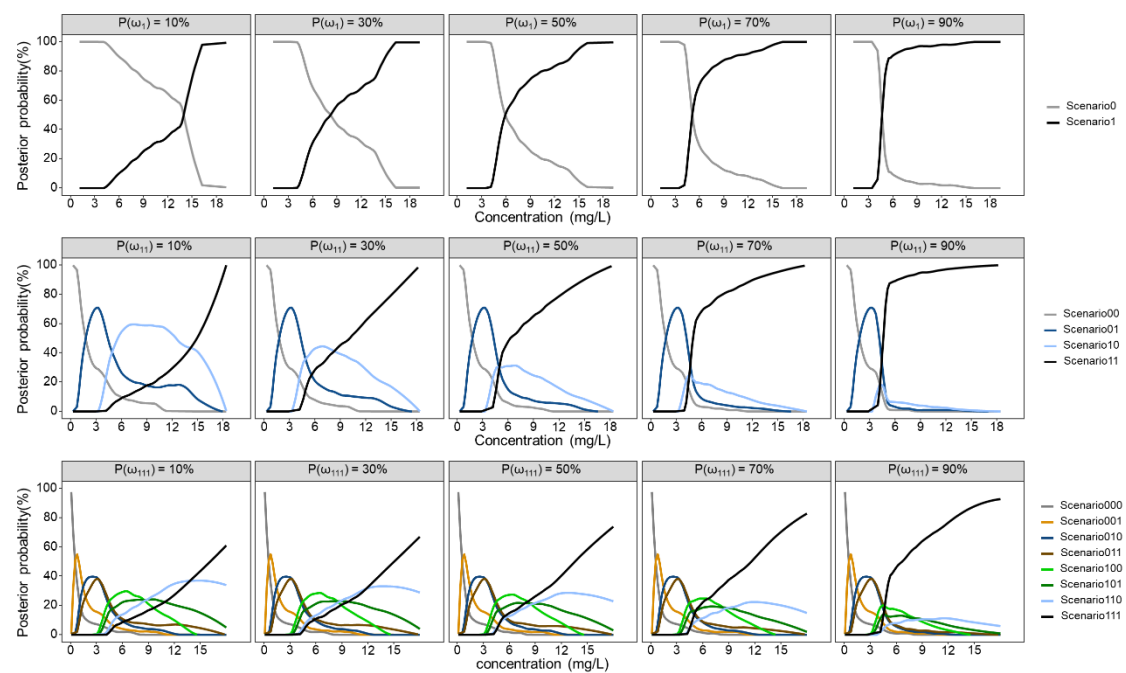

## Reference

- 1 Li, Z. R. *et al.* Handling Delayed or Missed Dose of Antiseizure Medications: A Model-Informed Individual Remedial Dosing. *Neurology* **100**, e921-e931 (2023).
- 2 Schoemaker, R., Wade, J. R. & Stockis, A. Brivaracetam population pharmacokinetics in children with epilepsy aged 1 month to 16 years. *Eur J Clin Pharmacol* **73**, 727-733 (2017).
- 3 Schoemaker, R., Wade, J. R. & Stockis, A. Brivaracetam population pharmacokinetics and exposure-response modeling in adult subjects with partial-onset seizures. *J Clin Pharmacol* **56**, 1591-1602 (2016).
- 4 Jiao, Z., Shi, X. J., Zhao, Z. G. & Zhong, M. K. Population pharmacokinetic modeling of steady state clearance of carbamazepine and its epoxide metabolite from sparse routine clinical data. *J Clin Pharm Ther* **29**, 247-256 (2004).
- 5 Saruwatari, J. *et al.* Effects of CYP2C19 and P450 oxidoreductase polymorphisms on the population pharmacokinetics of clobazam and N-desmethyclobazam in Japanese patients with epilepsy. *Ther Drug Monit* **36**, 302-309 (2014).
- 6 Sunkaraneni, S. *et al.* Modeling and simulations to support dose selection for eslicarbazepine acetate therapy in pediatric patients with partial-onset seizures. *J Pharmacokinet Pharmacodyn* **45**, 649-658 (2018).
- 7 Gidal, B. E. *et al.* Exposure-safety and efficacy response relationships and population pharmacokinetics of eslicarbazepine acetate. *Acta Neurol Scand* **138**, 203-211 (2018).
- 8 Winkler, J., Schoemaker, R. & Stockis, A. Population pharmacokinetics of adjunctive lacosamide in pediatric patients with epilepsy. *J Clin Pharmacol* **59**, 541-547 (2019).
- 9 Winkler, J., Schoemaker, R. & Stockis, A. Modeling and simulation for the evaluation of dose adaptation rules of intravenous lacosamide in children. *Epilepsy Res* **149**, 13-16 (2019).
- 10 van Dijkman, S. C. *et al.* Effect of age-related factors on the pharmacokinetics of lamotrigine and potential implications for maintenance dose optimisation in future clinical trials. *Clin Pharmacokinet* **57**, 1039-1053 (2018).
- 11 Wang, M. L. *et al.* Estrogen profile- and pharmacogenetics-based lamotrigine dosing regimen optimization: Recommendations for pregnant women with epilepsy. *Pharmacol Res* **169**, 105610 (2021).
- 12 Chhun, S. *et al.* Population pharmacokinetics of levetiracetam and dosing recommendation in children with epilepsy. *Epilepsia* **50**, 1150-1157 (2009).
- 13 Pigeolet, E., Jacqmin, P., Sargentini-Maier, M. L. & Stockis, A. Population pharmacokinetics of levetiracetam in Japanese and Western adults. *Clin Pharmacokinet* **46**, 503-512 (2007).
- 14 Li, Y. *et al.* Population pharmacokinetics and dosing regimen optimization of levetiracetam in epilepsy during pregnancy. *Br J Clin Pharmacol* **89**, 1152-1161 (2023).
- 15 Lin, W. W. *et al.* Population pharmacokinetics of oxcarbazepine active metabolite in Chinese paediatric epilepsy patients and its application in individualised dosage regimens. *Eur J Clin Pharmacol* **75**, 381-392 (2019).
- 16 Lin, W. W. *et al.* Glomerular filtration rate is a major predictor of clearance of oxcarbazepine active metabolite in adult Chinese epileptic patients: a population pharmacokinetic analysis. *Ther Drug Monit* **41**, 665-673 (2019).
- 17 Li, S. *et al.* Population pharmacokinetics and dosing optimization of perampanel in children with epilepsy: A real-world study. *Epilepsia* **65**, 1687-1697 (2024).

- 18 Takenaka, O., Ferry, J., Saeki, K. & Laurenza, A. Pharmacokinetic/pharmacodynamic analysis of adjunctive perampanel in subjects with partial-onset seizures. *Acta Neurol Scand* **137**, 400-408 (2018).
- 19 Goto, S. *et al.* Population estimation of the effects of cytochrome P450 2C9 and 2C19 polymorphisms on phenobarbital clearance in Japanese. *Ther Drug Monit* **29**, 118-121 (2007).
- 20 Girgis, I. G. *et al.* Pharmacokinetic-pharmacodynamic assessment of topiramate dosing regimens for children with epilepsy 2 to <10 years of age. *Epilepsia* **51**, 1954-1962 (2010).
- 21 Ding, J. *et al.* A population pharmacokinetic model of valproic acid in pediatric patients with epilepsy: a non-linear pharmacokinetic model based on protein-binding saturation. *Clin Pharmacokinet* **54**, 305-317 (2015).
- 22 Teixeira-da-Silva, P. *et al.* Population pharmacokinetics of valproic acid in pediatric and adult caucasian patients. *Pharmaceutics* **14**, 811 (2022).
- 23 Nielsen, J. C. *et al.* Population pharmacokinetics analysis of vigabatrin in adults and children with epilepsy and children with infantile spasms. *Clin Pharmacokinet* **53**, 1019-1031 (2014).
- 24 Okada, Y. *et al.* Population estimation regarding the effects of cytochrome P450 2C19 and 3A5 polymorphisms on zonisamide clearance. *Ther Drug Monit* **30**, 540-543 (2008).
- 25 Kim, H. *et al.* Is Bioequivalence Established Based on the Reference-Scaled Average Bioequivalence Approach Relevant to Chronic Administration of Phenytoin? Perspectives Based on Population Pharmacokinetic Modeling and Simulations. *J Clin Pharmacol* **59**, 1061-1069 (2019).
